# Supplementary material
Source: PubMed Central journal article supplement (PMC9970011)
Supplement: NIHMS1872438-supplement-Supplementary_Material.pdf [file NIHMS1872438-supplement-Supplementary_Material.pdf]

## Supplementary Information

### **A conserved nonribosomal peptide synthetase in *Xenorhabdus bovienii* produces citrulline-functionalized lipopeptides**

Jhe-Hao Li,<sup>1,2</sup> Wooyoung Cho,<sup>1,2</sup> Randy Hamchand,<sup>1,2</sup> Joonseok Oh,<sup>1,2</sup> and Jason M. Crawford<sup>1,2,3,\*</sup>

<sup>1</sup> Department of Chemistry, Yale University, New Haven, CT 06511, USA.

<sup>2</sup> Institute of Biomolecular Design & Discovery, Yale University, West Haven, CT 06516, USA.

<sup>3</sup> Department of Microbial Pathogenesis, Yale University School of Medicine, New Haven, CT 06536 USA.

**E-mail:** [jason.crawford@yale.edu](mailto:jason.crawford@yale.edu)

## Table of Contents

|                       |                                                                                                                                                               |    |
|-----------------------|---------------------------------------------------------------------------------------------------------------------------------------------------------------|----|
| Supplementary Methods | 3                                                                                                                                                             |    |
| Table S1              | <i>XBJI_2367</i> homologs in <i>X. bovienii</i> strains                                                                                                       | 6  |
| Table S2              | <i>XBJI_2367</i> homologs in <i>Xenorhabdus</i> species                                                                                                       | 7  |
| Table S3              | Primers used in this study                                                                                                                                    | 8  |
| Table S4              | <i>XBJI_2367</i> dependent ions in <i>E. coli</i> BAP1 and <i>X. bovienii</i>                                                                                 | 9  |
| Table S5              | <sup>1</sup> H and <sup>13</sup> C NMR assignments of bovienimide A ( <b>5</b> ) and bovienimide B ( <b>6</b> )                                               | 10 |
| Figure S1             | Sequence alignment of C/E domain key residues                                                                                                                 | 11 |
| Figure S2             | The sequence logo showing the consensus sequences of specificity codes in the A domains                                                                       | 12 |
| Figure S3             | Co-expression of pACYC- <i>XBJI_2367</i> and pCDF- <i>Leup</i> resulted in higher production of <b>5</b> and <b>6</b> at 30°C                                 | 13 |
| Figure S4             | Key COSY and HMBC correlations of bovienimide B ( <b>6</b> )                                                                                                  | 14 |
| Figure S5             | Tandem MS assignment of proposed compound <b>1</b>                                                                                                            | 15 |
| Figure S6             | Tandem MS assignment of proposed compound <b>2</b>                                                                                                            | 16 |
| Figure S7             | Tandem MS assignment of proposed compound <b>3</b>                                                                                                            | 17 |
| Figure S8             | Tandem MS assignment of proposed compound <b>4</b>                                                                                                            | 18 |
| Figure S9             | Tandem MS assignment of bovienimide A ( <b>5</b> )                                                                                                            | 19 |
| Figure S10            | Tandem MS assignment of bovienimide B ( <b>6</b> )                                                                                                            | 20 |
| Figure S11            | Tandem MS assignment of proposed compound <b>7</b>                                                                                                            | 21 |
| Figure S12            | Tandem MS assignment of proposed compound <b>8</b>                                                                                                            | 22 |
| Figure S13            | Tandem MS assignment of proposed compound <b>9</b>                                                                                                            | 23 |
| Figure S14            | Tandem MS assignment of proposed compound <b>10</b>                                                                                                           | 24 |
| Figure S15            | Tandem MS assignment of proposed compound <b>11</b>                                                                                                           | 25 |
| Figure S16            | Configuration analysis of bovienimide B ( <b>6</b> ) using Marfey's reagent                                                                                   | 26 |
| Figure S17            | EICs of spontaneous formed methyl ( <b>6c</b> ), ethyl ( <b>6b</b> , <b>8b</b> ) and butyl esters ( <b>6d</b> ) in <i>E. coli</i> expressing <i>XBJI_2367</i> | 27 |
| Figure S18            | Tandem MS assignment of proposed compound <b>6b</b>                                                                                                           | 28 |
| Figure S19            | Tandem MS assignment of proposed compound <b>8b</b>                                                                                                           | 29 |

|            |                                                                                                                                |    |
|------------|--------------------------------------------------------------------------------------------------------------------------------|----|
| Figure S20 | Tandem MS assignment of proposed compound <b>6c</b>                                                                            | 30 |
| Figure S21 | Tandem MS assignment of proposed compound <b>6d</b>                                                                            | 31 |
| Figure S22 | Maximum likelihood tree of all annotated adenylation domains in <i>X. bovienii</i> SS-2004 and <i>XBJI_2367</i> homologues     | 32 |
| Figure S23 | <sup>1</sup> H NMR spectrum of bovienimide A ( <b>5</b> ), 600 MHz, DMSO- <i>d</i> <sub>6</sub> , 25 °C                        | 33 |
| Figure S24 | gCOSY NMR spectrum of bovienimide A ( <b>5</b> ), 600 MHz, DMSO- <i>d</i> <sub>6</sub> , 25 °C                                 | 34 |
| Figure S25 | zTOCSY NMR spectrum of bovienimide A ( <b>5</b> ), 600 MHz, DMSO- <i>d</i> <sub>6</sub> , 25 °C                                | 35 |
| Figure S26 | <sup>1</sup> H- <sup>13</sup> C gHSQC NMR spectrum of bovienimide A ( <b>5</b> ), 600 MHz, DMSO- <i>d</i> <sub>6</sub> , 25 °C | 36 |
| Figure S27 | <sup>1</sup> H- <sup>13</sup> C gHMBC NMR spectrum of bovienimide A ( <b>5</b> ), 600 MHz, DMSO- <i>d</i> <sub>6</sub> , 25 °C | 37 |
| Figure S28 | <sup>1</sup> H NMR spectrum of bovienimide B ( <b>6</b> ), 600 MHz, MeOD- <i>d</i> <sub>4</sub> , 25 °C                        | 38 |
| Figure S29 | gCOSY NMR spectrum of bovienimide B ( <b>6</b> ), 600 MHz, MeOD- <i>d</i> <sub>4</sub> , 25 °C                                 | 39 |
| Figure S30 | <sup>1</sup> H- <sup>13</sup> C gHSQC NMR spectrum of bovienimide B ( <b>6</b> ), 600 MHz, MeOD- <i>d</i> <sub>4</sub> , 25 °C | 40 |
| Figure S31 | <sup>1</sup> H- <sup>13</sup> C gHMBC NMR spectrum of bovienimide B ( <b>6</b> ), 600 MHz, MeOD- <i>d</i> <sub>4</sub> , 25 °C | 41 |
|            | Supplementary References                                                                                                       | 42 |

## Supplementary Methods

### GPCR PRESTO-Tango Assay

PRESTO-Tango assay was performed according to the protocol reported by Kroeze *et al.* (Kroeze *et al.*, 2015). Briefly, HTLA cells maintained in DMEM containing 10% heat-inactivated fetal bovine serum (HI-FBS) and 1% penicillin/streptomycin were seeded in 96-well tissue culture plates and transfected with 200 ng of C3AR1-Tango plasmid (Addgene plasmid #66231) for 20 h. The medium was replaced with DMEM containing 20 mM HEPES and 1% penicillin/streptomycin 2 h prior to treatment with compounds **5** or **6** (100  $\mu$ M, 33  $\mu$ M, 11  $\mu$ M, 3.7  $\mu$ M, 1.2  $\mu$ M, 0.41  $\mu$ M) in DMSO (final concentration 0.125%), complement protein C3a (10  $\mu$ M, 3.3  $\mu$ M, 1.1  $\mu$ M, 0.37  $\mu$ M, 0.12  $\mu$ M, 0.041  $\mu$ M) in DMSO (final concentration 0.125%), or 0.125% DMSO solvent vehicle. After incubation for 20 h, each well was reacted with 50  $\mu$ l of Bright-Glo solution (Promega), diluted 20-fold in DPBS with 20 mM HEPES, for 20 min. Luminescence was measured with a Perkin Elmer EnVision 2100 plate reader.

### ISG, NF- $\kappa$ B, LDH cytotoxicity assays

THP1-Dual™ (Invivogen) reporter cells contain two inducible promoters that express the secreted luciferase or secreted embryonic alkaline phosphatase (SEAP) reporter genes upon stimulation of the interferon regulatory factor (IRF) or NF- $\kappa$ B pathways, respectively. THP1-Dual™ cells maintained under manufacturer's instructions in RPMI medium (Gibco 11875093) with 10% HI-FBS (Gibco) and 1% penicillin/streptomycin (Gibco) were seeded into 96-well plates and differentiated into a macrophage-like state by incubation with 50 nM phorbol 12-myristate 13-acetate (PMA) (Promega, V1171-5mg) for 72 h. The cells were then treated with compound **5** or **6** (100  $\mu$ M, 33  $\mu$ M, 11  $\mu$ M, 3.7  $\mu$ M, 1.2  $\mu$ M, 0.41  $\mu$ M) in DMSO (final concentration 0.1%), positive control (transfected poly dA:dT for ISG response, 100 ng ml<sup>-1</sup> lipopolysaccharide (LPS)

for NF- $\kappa$ B response), or solvent vehicle negative control (0.1% DMSO) and incubated for 16-20 h. The supernatants were collected and incubated with the luciferase detection agent QUANTI-Luc™ (Invivogen) to observe ISG responses or with the SEAP detection agent QUANTI-Blue™ (Invivogen) to detect NF- $\kappa$ B responses. The NF- $\kappa$ B assay was also carried out without the differentiation step, as PMA treatment generated higher background readings due to the activation of NF- $\kappa$ B.

Possible cell cytotoxicity of compounds **5** and **6** was measured using CyQUANT™ LDH Cytotoxicity Assay Kit (Thermo Fisher Scientific) according to the manufacturer's instructions. The spontaneous LDH release was measured using the supernatant of  $\sim 1 \times 10^5$  cells incubated with 0.1% DMSO and the maximum LDH release was measured by lysing cells grown in the same conditions. Supernatants of the PMA-treated or untreated THP1-Dual™ cells challenged with **5** or **6** (100  $\mu$ M, 33  $\mu$ M, 11  $\mu$ M) in DMSO (final concentration 0.1%) were used for LDH quantification. Absorbance measurements at 490 nm and 680 nm were taken on a Perkin Elmer EnVision 2100 plate reader.

### **Antimicrobial assays**

Compounds **5** and **6** were dissolved in DMSO to a concentration of 50 mM. Each compound was diluted in the corresponding medium to yield final concentrations of 500, 250, 125, 62.5, 31.25, 15.625, 0  $\mu$ M (final DMSO concentration 1%) in triplicate wells of a 96-well microplate. *Escherichia coli* DH5 $\alpha$  was grown in LB broth overnight in a shaking incubator at 250 RPM and 37°C. *Bacillus subtilis* and *Saccharomyces cerevisiae* were grown overnight in LB and YPD media, respectively, in a shaking incubator at 250 RPM and 30°C. The bacterial/yeast cultures were diluted to (OD<sub>600</sub>) of 0.5, then diluted further to yield  $1 \times 10^6$  cells ml<sup>-1</sup>. 50  $\mu$ l of the diluted bacterial cultures was added to each well containing 50  $\mu$ l of compound or control. The microplate was

incubated overnight in a stationary 37°C (*E. coli*) or 30°C (*B. subtilis*, *S. cerevisiae*) incubator and the OD<sub>600</sub> of each well was measured using a Perkin Elmer EnVision 2100 plate reader.

**Table S1** *XBJ1\_2367* homologs in *X. bovienii* strains. Genes are shown with magnifying genomes (MAGE) accession codes.

| <i>X. bovienii</i> strain name | <i>XBJ1_2367</i> orthologue       | Amino acid identity (%) |
|--------------------------------|-----------------------------------|-------------------------|
| puntauvense                    | XBP1v2_400023                     | 92.53                   |
| felitiae France                | XBXBFFR1v2_630020                 | 92.47                   |
| Jollieti                       | XB12v2_1260017                    | 100                     |
| oregonense                     | XBO1v2_1300059                    | 92.11                   |
| kraussei Quebec                | XBKQ1v2_850017                    | 92.09                   |
| Intermedium                    | XBI1v2_1260106                    | 93.04                   |
| CS03                           | XBW1v5_2161                       | 92.47                   |
|                                | XBW1v5_2162 (terminal PCP domain) |                         |
| felitiae Florida               | XBFFL1v2_1440021                  | 92.47                   |
| kraussei Becker Underwood      | XBKB1v2_2960007                   | 92.23                   |
| felitiae Moldova               | XBFM1v2_1510028                   | 92.44                   |

**Table S2** *XBJI\_2367* homologs in *Xenorhabdus* species and their adenylation domain specificity codes.

| Species                              | NCBI Accession | Amino Acid Identity | A1 domain       | A2 domain       | A3 domain       |
|--------------------------------------|----------------|---------------------|-----------------|-----------------|-----------------|
| <i>X. beddingii</i>                  | WP_086111596.1 | 68.0%               | D A W L L G A V | D V W H F S L I | D I S N I G G V |
| <i>X. bovienii</i> SS-2004           | CBJ81493.1     | 100.0%              | D A W L I G A V | D L Y N N A L - | D I S N I G A I |
| <i>X. budapestensis</i>              | WP_099134826.1 | 68.5%               | D A W I I G V I | D V W H L S L I | D I S N I G A V |
| <i>X. doucetiae</i>                  | WP_071827274.1 | 73.4%               | D G W L I G A V | D L Y N N A L T | D I S N I G A V |
| <i>X. eapokensis</i>                 | WP_074023869.1 | 68.3%               | D A W L L G A V | D V W F L S L I | D I S N I G A I |
| <i>X. ehlersii</i>                   | WP_099131307.1 | 69.3%               | D A W L L G A V | D V W Y L S L I | D I S N I G A I |
| <i>X. griffinae</i> <sup>a</sup>     | WP_053014213.1 | 68.4%               | D A W L M G A V | D V W Y L S L I | D I S N I G A I |
| <i>X. hominickii</i>                 | WP_069316711.1 | 69.4%               | D V Q F I A H - | D A W X V A A I | D I S N I G A V |
| <i>X. innexi</i>                     | WP_086956251.1 | 65.0%               | D A W L L G A V | D V W H L S L I | D I S N I G A I |
| <i>X. ishibashii</i>                 | WP_099116303.1 | 68.6%               | D A W L L G A V | D V W Y L S L I | D I S N I G A I |
| <i>X. japonica</i>                   | WP_092519020.1 | 70.8%               | D A W L L G A V | D V W H L S L I | D I S N I G A V |
| <i>X. khoisanae</i> SF87             | WP_084728559.1 | 69.7%               | D A W L M G A V | D V W Y L S L V | D I S N I G A I |
| <i>X. kozodoii</i>                   | WP_099141660.1 | 68.3%               | D A W L L G A I | D V W Y L S L I | D I S N I G A I |
| <i>X. mauleonii</i>                  | WP_092507495.1 | 68.1%               | D V W F I - G I | D L Y N N A L T | D I S N I G A V |
| <i>X. miraniensis</i>                | WP_099114446.1 | 70.2%               | D A W L I G A V | D V W Y L S L V | D I S N I G A I |
| <i>X. nematophila</i> ATCC19061      | WP_050986630.1 | 70.2%               | D A W L L G A V | D L Y N N A L T | D I S N I G A V |
| <i>X. poinarii</i>                   | WP_052708256.1 | 73.7%               | D A W I L G A I | D L Y N N A M - | D I S N I G A V |
| <i>X. stockiae</i>                   | WP_099125076.1 | 64.9%               | D A W L L G A I | D V W H L S L I | D I S N I G A I |
| <i>X. szentirmaii</i> DSM16338       | PHM32961.1     | 68.6%               | D V W F I - G V | D L Y X N A L T | D I S N I G A V |
| <i>X. thuongxuanensis</i>            | WP_074019651.1 | 68.7%               | D A W L L G A V | D V W Y L S L I | D I S N I G A I |
| <i>X. vietnamensis</i>               | WP_086108473.1 | 70.7%               | D A W L L G A I | D V W H L S L I | D I S N I G A V |
| <i>Xenorhabdus</i> sp. NBAII XenSa04 | WP_052189507.1 | 67.4%               | D A W I I G A I | D V W H F S L I | D I S N I G A V |
| <i>Xenorhabdus</i> sp. KK7.4         | WP_099120489.1 | 64.9%               | D S W L L G A I | D V W H L S L I | D I S N I G A I |
| <i>Xenorhabdus</i> sp. KJ12.1        | WP_099109723.1 | 65.0%               | D A W L L G A I | D V W H L S L I | D I S N I G A I |

<sup>a</sup> Gene assigned to *X. griffinae* based on Magnifying Genome (MaGe) platform.



**Table S3** Primers used in this study

| Primer Name     | Sequence                                                |
|-----------------|---------------------------------------------------------|
| ACYC_PacI       | GTAAAAAATTAATTAATCTCCTTCTTATACTTAACTAATATA<br>CTAAGATGG |
| ACYC_HindIII    | GTAAAAAATAAGCTTAAAAAACTCGAGTAACCTAGGCTGCTG              |
| 2367_I_PacI     | GTAAAAAATTTAATTAATGTCCACACAGCCAAAATCG                   |
| 2367_I_HindIII  | GTAAAAAATAAGCTTGTGTACCCAGGTG                            |
| 2367_II_HindIII | GTAAAAAATAAGCTTTCGCCCTGAA                               |
| 2367_II_XhoI    | GTAAAAAATCTCGAGTTATTTAGAATAAAAATTCTTTGCTAATT<br>TTGT    |

**Table S4** *XBJI\_2367* dependent ions in *E. coli* BAP1 and *X. bovienii*

| <i>m/z</i>            | Retention time (min) <sup>a</sup> | AUC <sup>b</sup> in <i>E. coli</i> BAP1 | AUC in <i>X. bovienii</i> SS-2004 |
|-----------------------|-----------------------------------|-----------------------------------------|-----------------------------------|
| 567.4221              | 22.1                              | 1.16E+06                                | 1.01E+07                          |
| 568.4077              | 22.7                              | 1.26E+06                                | 3.66E+06                          |
| 569.4403              | 24.1                              | 3.55E+06                                | 4.56E+07                          |
| 570.4243              | 24.7                              | 6.62E+06                                | 3.28E+07                          |
| 585.4332              | 21.5                              | 1.37E+06                                | 2.76E+06                          |
| 586.4173              | 22.1                              | 6.48E+05                                | 8.13E+05                          |
| 595.4544              | 25.0                              | 1.82E+06                                | 4.23E+06                          |
| 596.4384              | 25.5                              | 4.90E+06                                | 5.08E+06                          |
| 597.4714              | 27.5                              | 1.30E+06                                | 5.23E+06                          |
| 598.4537              | 27.5                              | 4.29E+06                                | 0.00E+00                          |
| 598.4537              | 28.0                              | 2.65E+06                                | 6.03E+06                          |
| 624.4712 <sup>d</sup> | 28.2                              | 2.35E+06                                | 0.00E+00                          |
| 624.4712 <sup>d</sup> | 28.6                              | 1.48E+06                                | 1.56E+06                          |
| 626.4864              | 30.8                              | 1.43E+06                                | 0.00E+00                          |
| 652.4999              | 31.3                              | 6.11E+05                                | 0.00E+00                          |
| 541.4059              | 21.1                              | 5.55E+05                                | 3.09E+06                          |
| 542.3914              | 21.6                              | 2.61E+05                                | 5.66E+05                          |
| 584.4384              | 26.3                              | 2.44E+06                                | 3.57E+06                          |
| 612.4377              | 22.7                              | 2.23E+04                                | 0.00E+00                          |
| 612.4339              | 23.0                              | 1.19E+05                                | 0.00E+00                          |
| 614.4481              | 24.5                              | 7.06E+05                                | 0.00E+00                          |
| 642.4923              | 27.5                              | 5.03E+05                                | 0.00E+00                          |
| 640.4648              | 24.5                              | 9.81E+04                                | 0.00E+00                          |
| 557.4021              | 18.8                              | 8.16E+04                                | 5.83E+05                          |
| 583.4171              | 20.0                              | 9.35E+04                                | 1.90E+05                          |
| 584.4021              | 20.5                              | 1.65E+04                                | 3.66E+04                          |
| 598.4648              | 27.6                              | 4.10E+05                                | 3.61E+05                          |
| 583.4550              | 25.8                              | 1.36E+06                                | 4.10E+06                          |

<sup>a</sup> Retention time was determined with LC-MS coupled to a Kinetex 5 $\mu$  C18 100 Å column (250  $\times$  4.6 mm) with a water:acetonitrile gradient from 5 to 100% in 30 minutes.

<sup>b</sup> Area under curve.

<sup>c</sup> 5-mL cultures of *E. coli* and *X. bovienii* SS-2004 were extracted to compare the relative abundance.

<sup>d</sup> These two features are distinct.

**Table S5** <sup>1</sup>H and <sup>13</sup>C NMR assignments of bovienimide A (**5**) and bovienimide B (**6**)

| position          | <b>5<sup>a</sup></b>                          |                        | <b>6<sup>b</sup></b>                          |                        |
|-------------------|-----------------------------------------------|------------------------|-----------------------------------------------|------------------------|
|                   | $\delta_{\text{H}}$ , mult. ( <i>J</i> in Hz) | $\delta_{\text{C}}$    | $\delta_{\text{H}}$ , mult. ( <i>J</i> in Hz) | $\delta_{\text{C}}$    |
| 1                 | 0.82, t (6.9)                                 | 14.38, CH <sub>3</sub> | 0.90, t (7.0)                                 | 13.00, CH <sub>3</sub> |
| 2-10 <sup>c</sup> | 1.20-1.33, m                                  | 29.39, CH <sub>2</sub> | 1.26-1.34, m                                  | 22.3, CH               |
| 11                | 1.19, m                                       | 29.29, CH <sub>2</sub> | 1.59, m                                       | 25.7, CH <sub>2</sub>  |
| 12                | 1.44, m                                       | 29.67, CH <sub>2</sub> | 1.32, m                                       | 28.8, CH <sub>2</sub>  |
| 13                | 2.05, m<br>2.09, m                            | 35.48, CH <sub>2</sub> | 2.21, m                                       | 35.10, CH <sub>2</sub> |
| 14                |                                               | 173.02, C              |                                               | 175.12, C              |
| 15                | 7.96, d (7.4)                                 |                        | 8.09, d (6.4)                                 |                        |
| 16                | 4.19, m                                       | 51.81, CH              | 4.26, m                                       | 52.36, CH              |
| 17                | 1.39, m                                       | 40.88, CH <sub>2</sub> | 1.58, m<br>1.54, m                            | 39.95, CH <sub>2</sub> |
| 18                | 1.54, m                                       | 24.64, CH              | 1.66, m                                       | 24.54, CH              |
| 19                | 0.80, d (6.6)                                 | 23.35, CH <sub>3</sub> | 0.94, d (6.5)                                 | 20.63, CH <sub>3</sub> |
| 20                | 0.85, d (6.6)                                 | 22.01, CH <sub>3</sub> | 0.98, d (6.5)                                 | 21.90, CH <sub>3</sub> |
| 21                |                                               | 172.77, C              |                                               | 174.04, C              |
| 22                | 8.10, d (7.4)                                 |                        | 8.37, d (7.2)                                 |                        |
| 23                | 4.21, quin (7.4)                              | 49.31, CH              | 4.35, quin (7.2)                              | 49.03, CH              |
| 24                | 1.16, d (7.4)                                 | 18.53, CH <sub>3</sub> | 1.36, d (7.2)                                 | 16.57, CH <sub>3</sub> |
| 25                |                                               | 172.37, C              |                                               | 173.39, C              |
| 26                | 7.86, d (8.4)                                 |                        | 7.98, d (8.1)                                 |                        |
| 27                | 4.11, td (4.82, 8.4)                          | 52.55, CH              | 4.38, m                                       | 51.87, CH              |
| 28                | 1.44, m<br>1.64, m                            | 29.64, CH <sub>2</sub> | 1.75, m<br>1.91, m                            | 28.30, CH <sub>2</sub> |
| 29                | 1.29, m                                       | 27.04, CH <sub>2</sub> | 1.49, m                                       | 26.12, CH <sub>2</sub> |
| 30                | 2.90, m                                       | 29.13, CH <sub>2</sub> | 3.08, td (2.64, 6.83)                         | 38.58, CH <sub>2</sub> |
| 31                |                                               | 159.17, C              |                                               | 160.65, C              |
| 32                |                                               | 174.03, C              |                                               | 175.53, C              |
| 33                | 7.00, d (2.17)<br>7.24, d (2.28)              |                        |                                               |                        |

<sup>a</sup>DMSO-*d*<sub>6</sub>, <sup>b</sup>methanol-*d*<sub>4</sub>, <sup>c</sup>methylene comprising C2-10 are indistinguishable

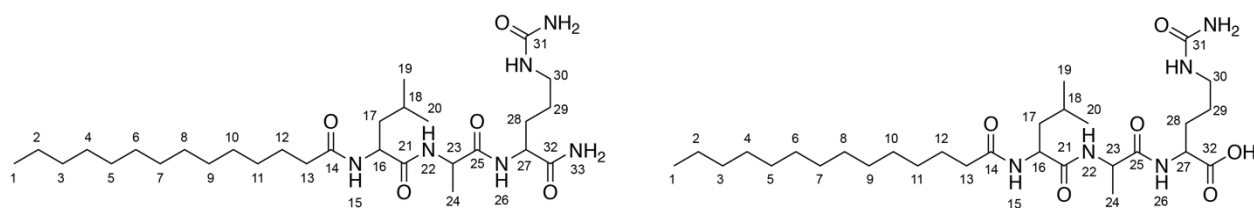



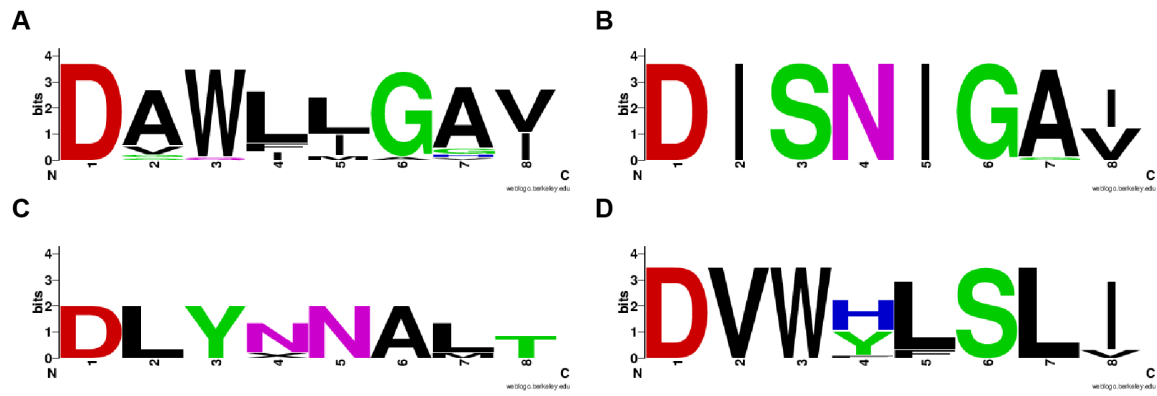

**Figure S2** The sequence logo showing the consensus sequences of specificity codes in the A domains. **A**, A1-domain. **B**, A3-domain. **C**, Group I A2-domain. **D**, Group II A2-domain.

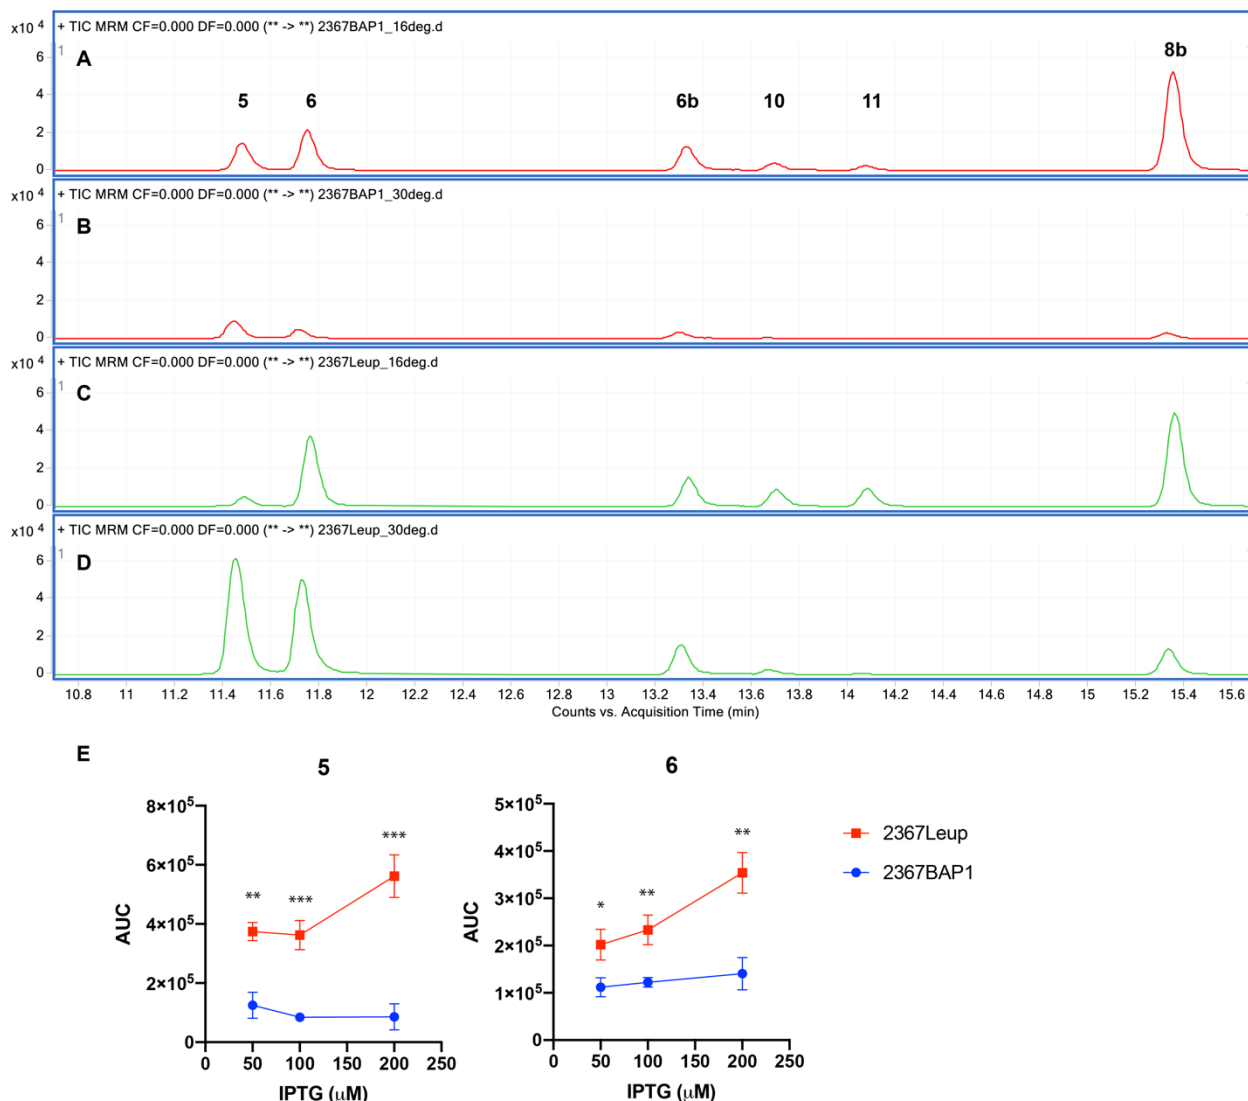

**Figure S3** Co-expression of pACYC-*XBJI\_2367* and pCDF-*Leup* resulted in higher production of **5** and **6** at 30°C. 5-mL LB culture extracted with ethyl acetate was analyzed by triple quadrupole with dynamic MRM mode with a linear gradient using water and acetonitrile solvent systems containing 0.1% formic acid at 0.3 mL/min, 0-15 min, 20 to 80% acetonitrile. **A**, pACYC-*XBJI\_2367* only expressed at 16°C. **B**, pACYC-*XBJI\_2367* only expressed at 30°C. **C**, pACYC-*XBJI\_2367* co-expressed with pCDF-*Leup* at 16°C. **D**, pACYC-*XBJI\_2367* co-expressed with pCDF-*Leup* at 30°C. **E**, Dose dependence production of bovienimides **5** and **6** against different concentrations of IPTG. Relative abundance was determined by comparing 5-mL cultures with the same extraction and injection methods.  $n=3$  biological replicates. \* $p < 0.05$ , \*\* $p < 0.01$ , \*\*\* $p < 0.001$ . Two-tailed t test.

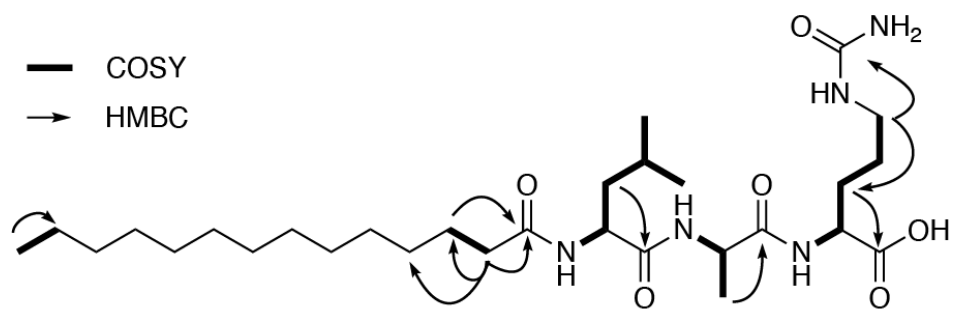

**Figure S4** Key COSY and HMBC correlations of bovienimide B (**6**).

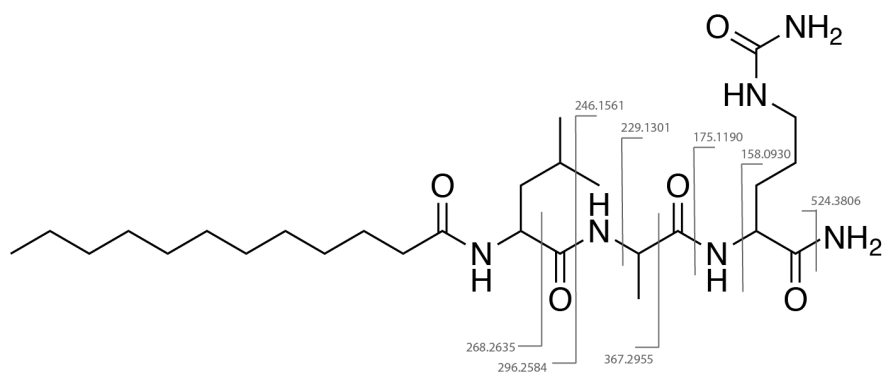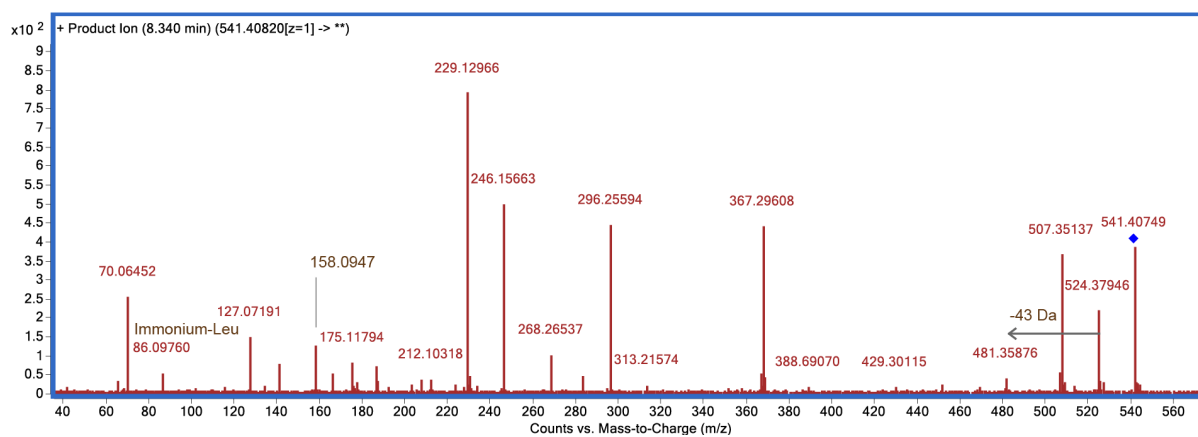

**Figure S5** Tandem MS assignment of proposed compound **1**. Calculated exact mass of peptide fragment ions are shown on the structure.



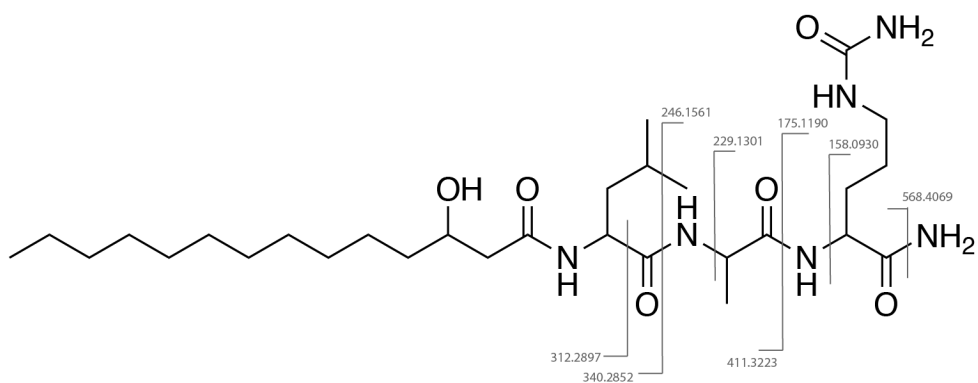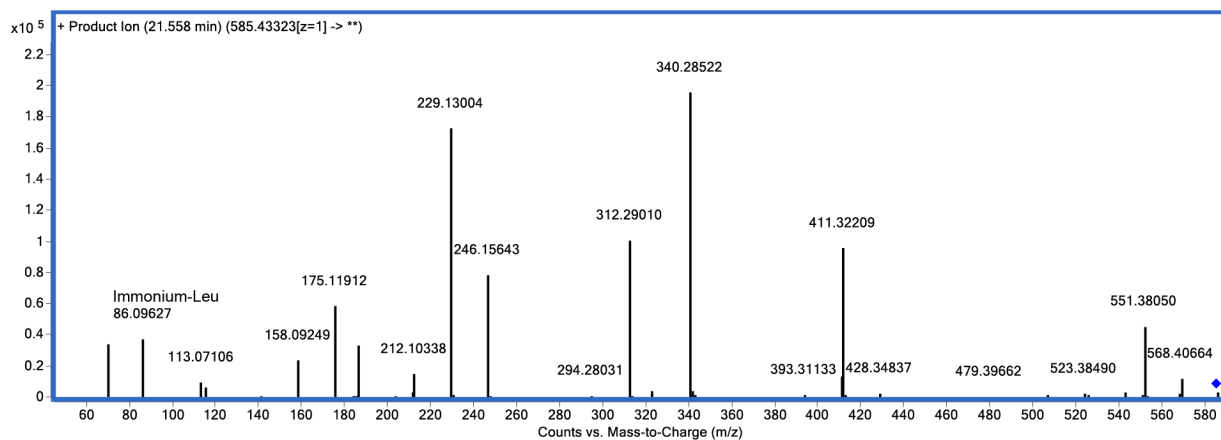

**Figure S6** Tandem MS assignment of proposed compound **2**. Calculated exact mass of peptide fragment ions are shown on the structure. The position and stereochemistry of the hydroxyl group on the acyl chain was not determined.

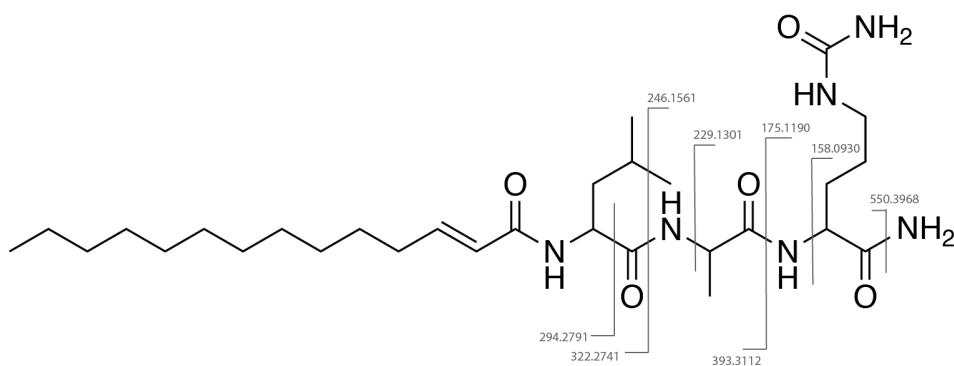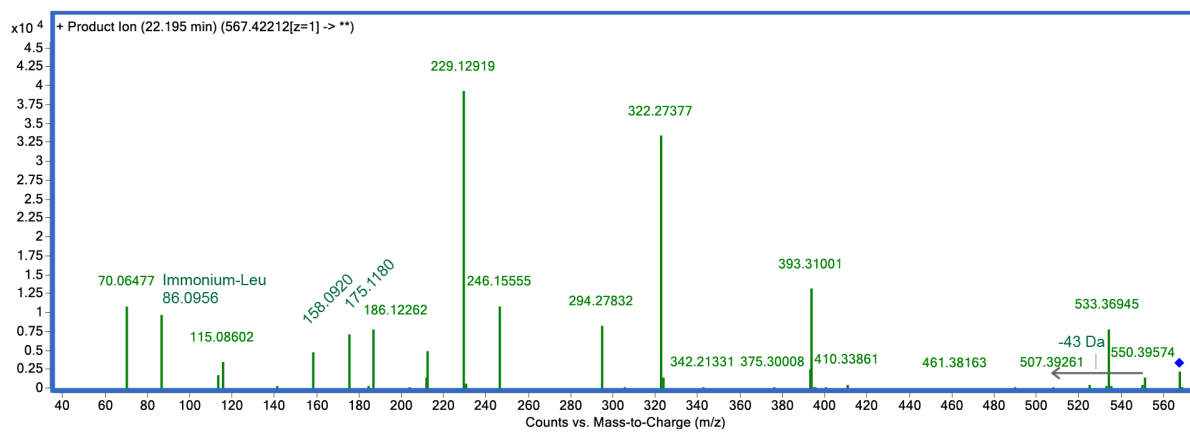

**Figure S7** Tandem MS assignment of proposed compound **3**. Calculated exact mass of peptide fragment ions are shown on the structure. Double bond position and configuration was not determined.

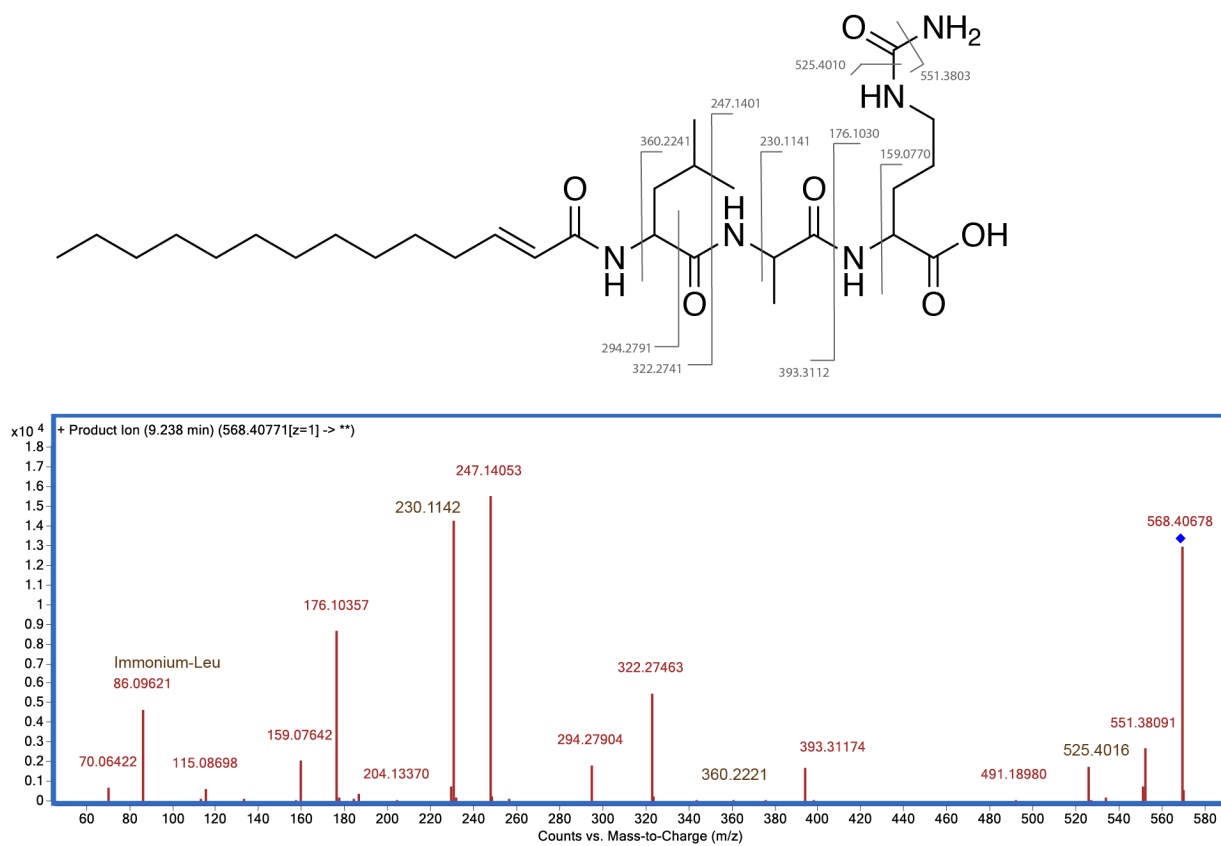

**Figure S8** Tandem MS assignment of proposed compound 4. Calculated exact mass of peptide fragment ions are shown on the structure. Double bond position and configuration was not determined.

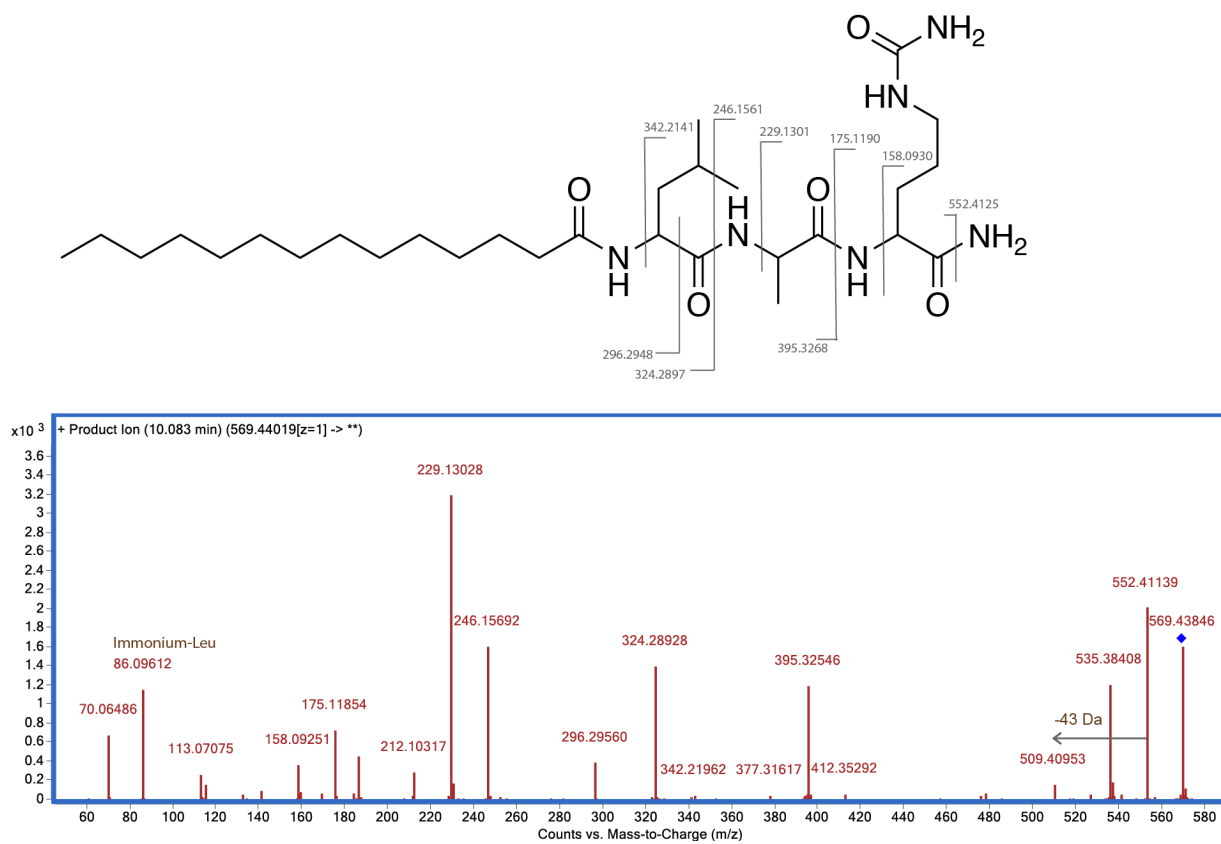

**Figure S9** Tandem MS assignment of bovienimide A (5). Calculated exact mass of peptide fragment ions are shown on the structure.

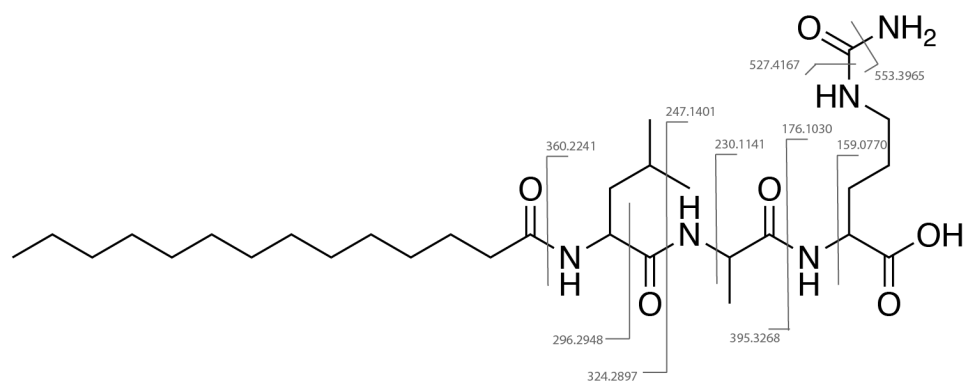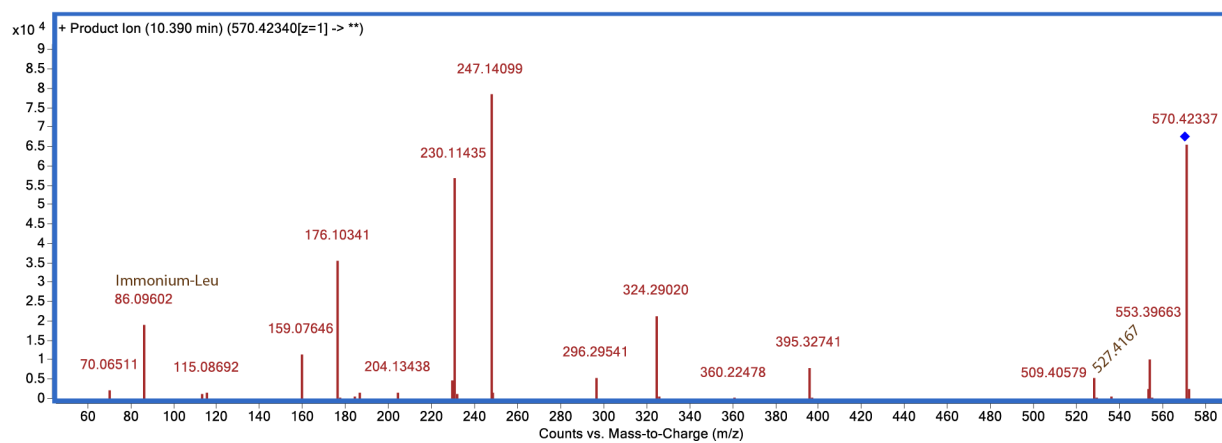

**Figure S10** Tandem MS assignment of bovienimide B (**6**). Calculated exact mass of peptide fragment ions are shown on the structure.

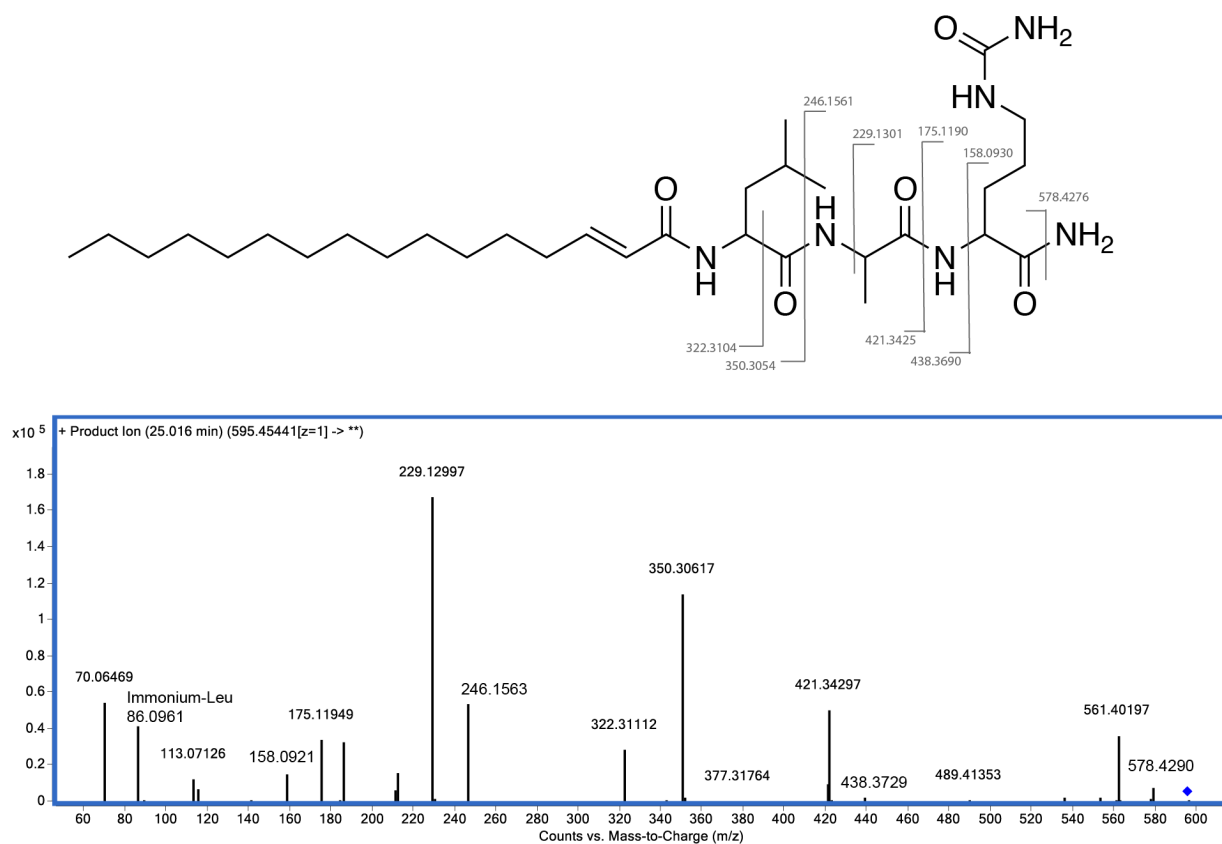

**Figure S11** Tandem MS assignment of proposed compound 7. Calculated exact mass of peptide fragment ions are shown on the structure. Double bond position and configuration was not determined.

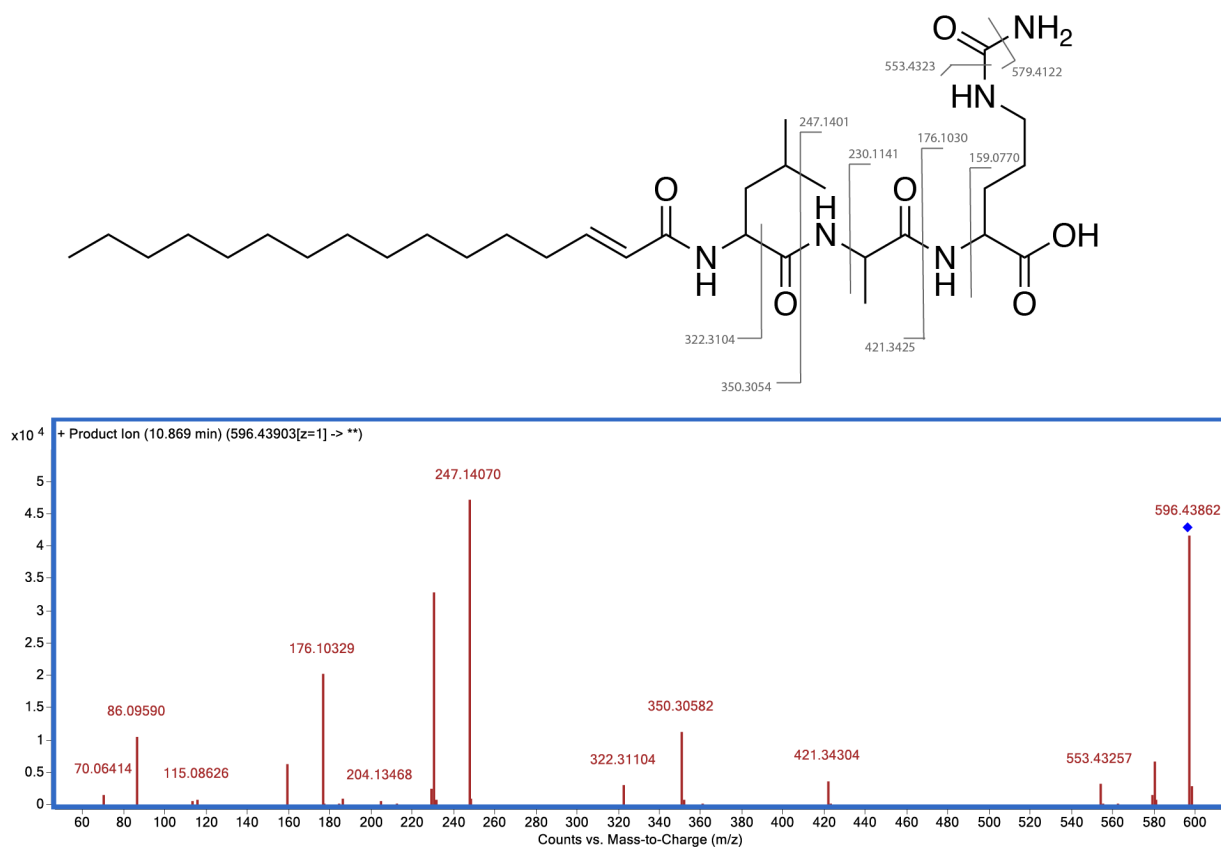

**Figure S12** Tandem MS assignment of proposed compound **8**. Calculated exact mass of peptide fragment ions are shown on the structure. Double bond position and configuration was not determined.

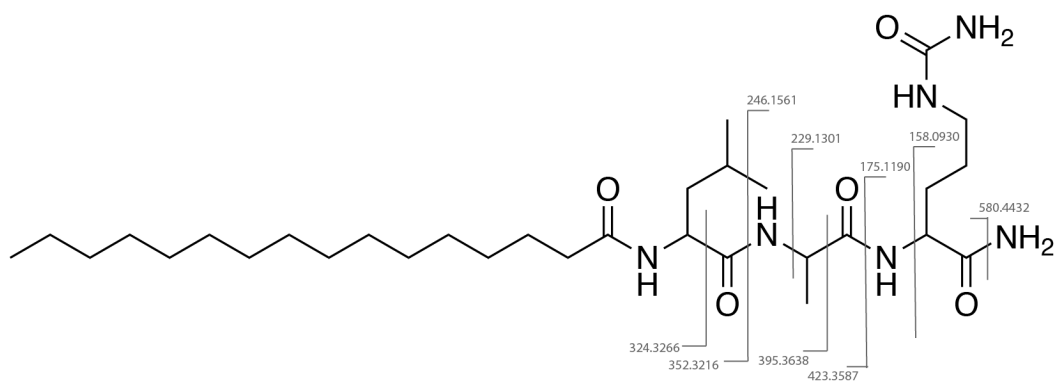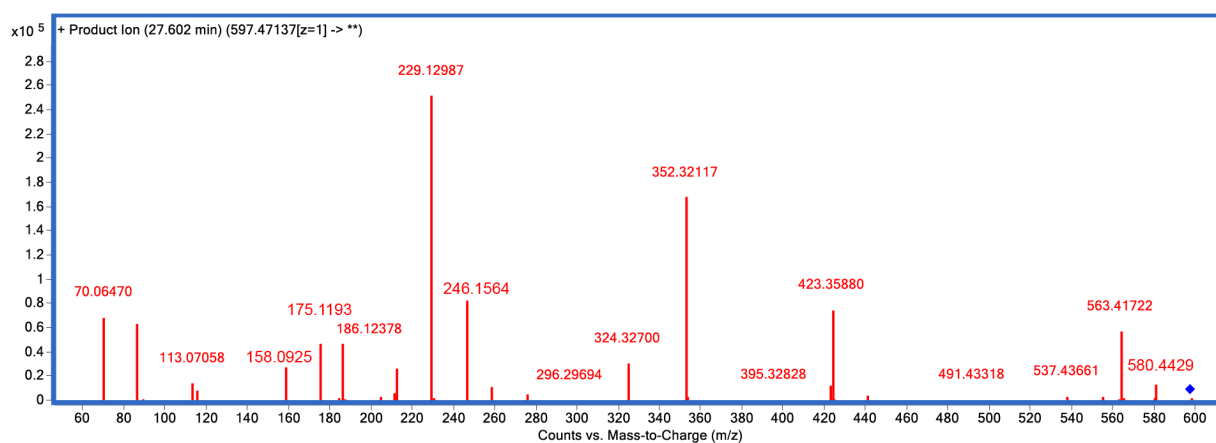

**Figure S13** Tandem MS assignment of proposed compound **9**. Calculated exact mass of peptide fragment ions are shown on the structure.



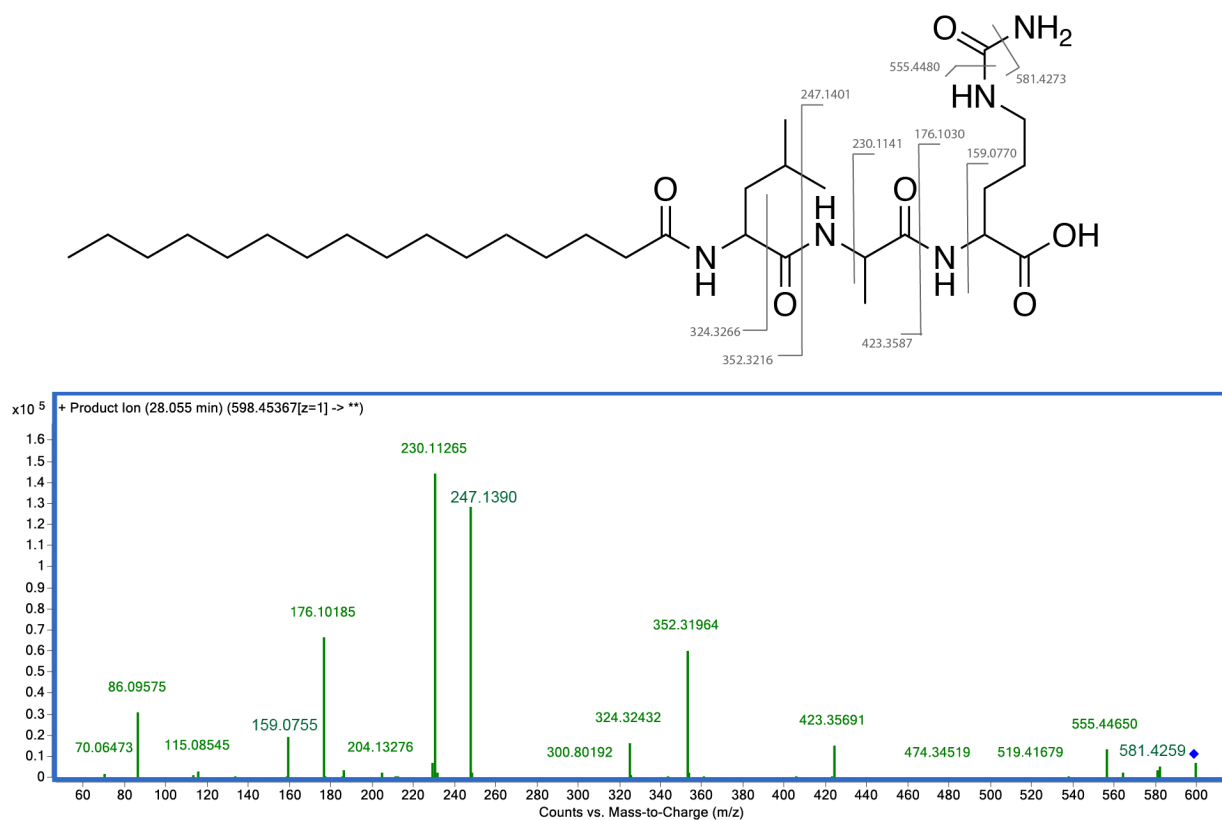

**Figure S14** Tandem MS assignment of proposed compound **10**. Calculated exact mass of peptide fragment ions are shown on the structure.

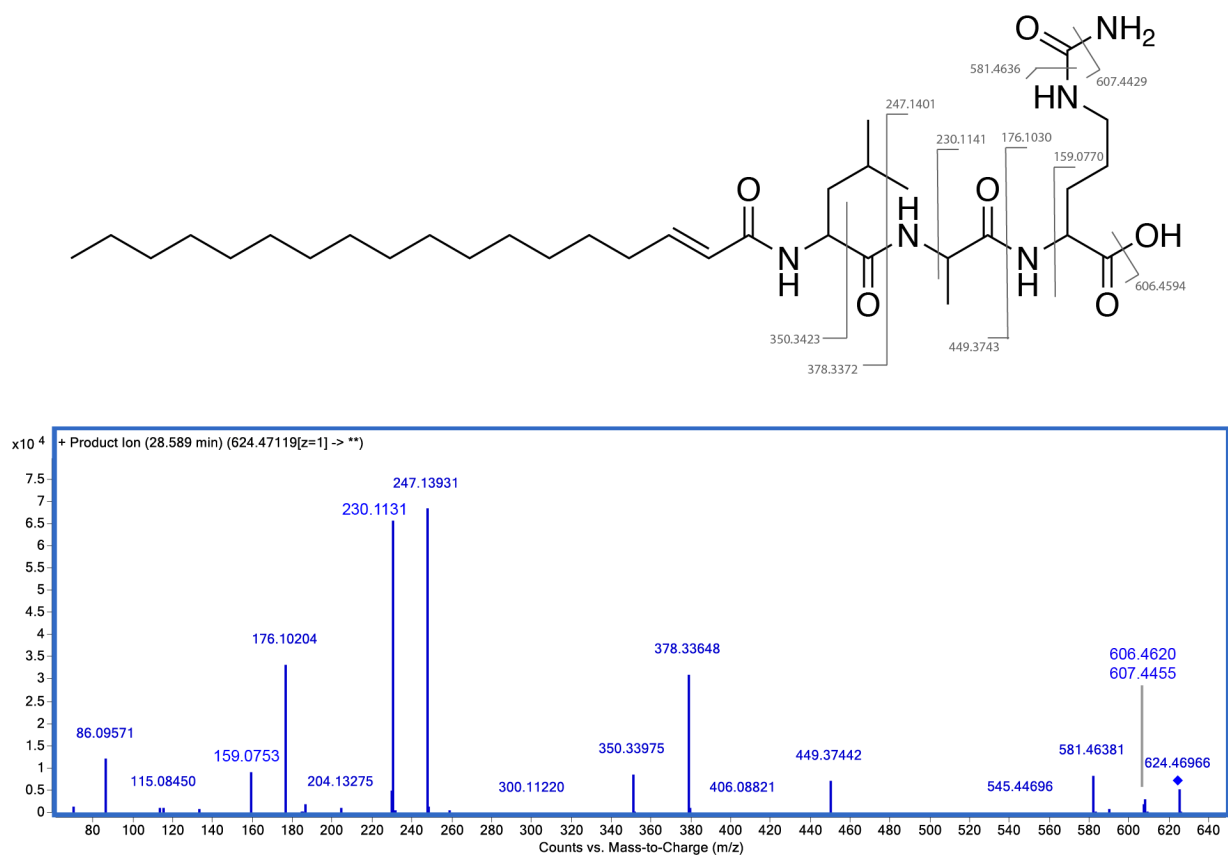

**Figure S15** Tandem MS assignment of proposed compound **11**. Calculated exact mass of peptide fragment ions are shown on the structure. Double bond position and configuration was not determined.

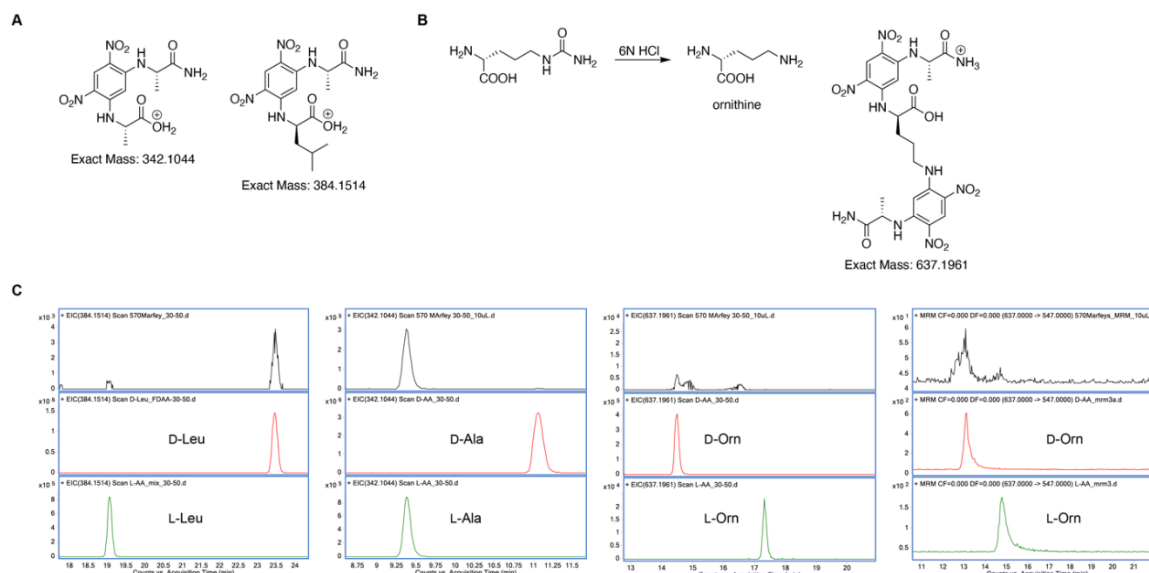

**Figure S16** Configuration analysis of bovienimide B (**6**) using Marfey's reagent. (A) Structures and exact masses of alanine and leucine FDAA adduct. (B) Hydrolysis of citrulline results in ornithine, which reacted with two equivalents of FDAA to form double addition adduct. (C) LC-MS analysis of derivatized standard amino acids (middle and bottom) and hydrolyzed bovienimide (top). The first three panels were EICs analyzed by HPLC-QTOF with a 10 ppm extraction window. The fourth panel was detected by dynamic multiple reaction monitoring (dMRM) mode. (637.0 - > 547.0, CE = 10).

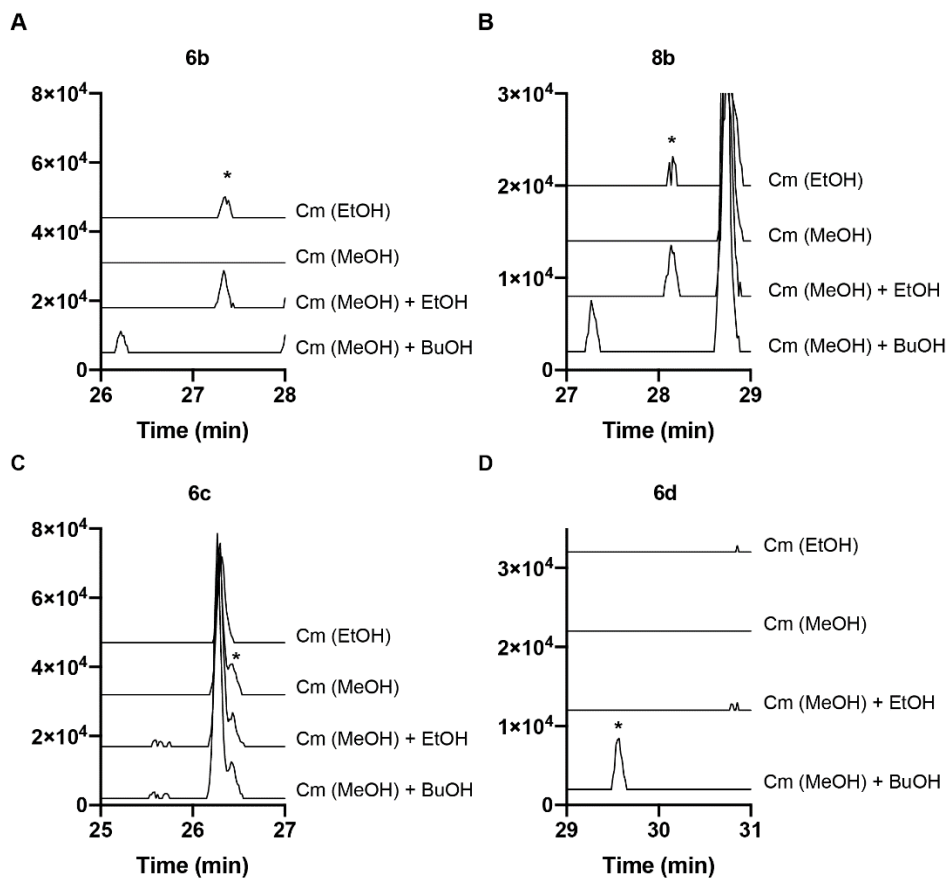

**Figure S17** EICs of methyl (**6c**), ethyl (**6b**, **8b**) and butyl esters (**6d**) in *E. coli* expressing *XBJI\_2367* in the presence of exogenous alcohols. Chloramphenicol stock solutions are prepared in methanol (Cm (MeOH)) and ethanol (Cm (EtOH)), with the addition of ethanol (+EtOH) or *n*-butanol (BuOH).

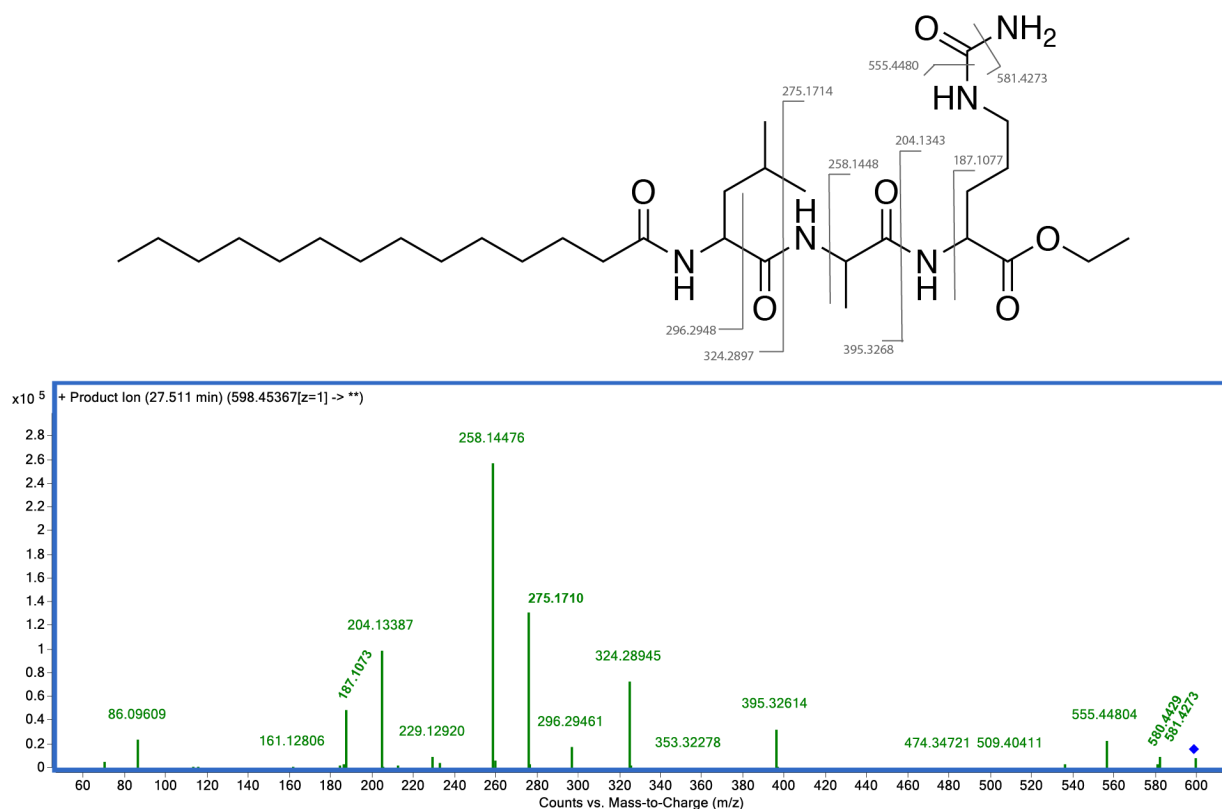

**Figure S18** Tandem MS assignment of proposed compound **6b**. Calculated exact mass of peptide fragment ions are shown on the structure.

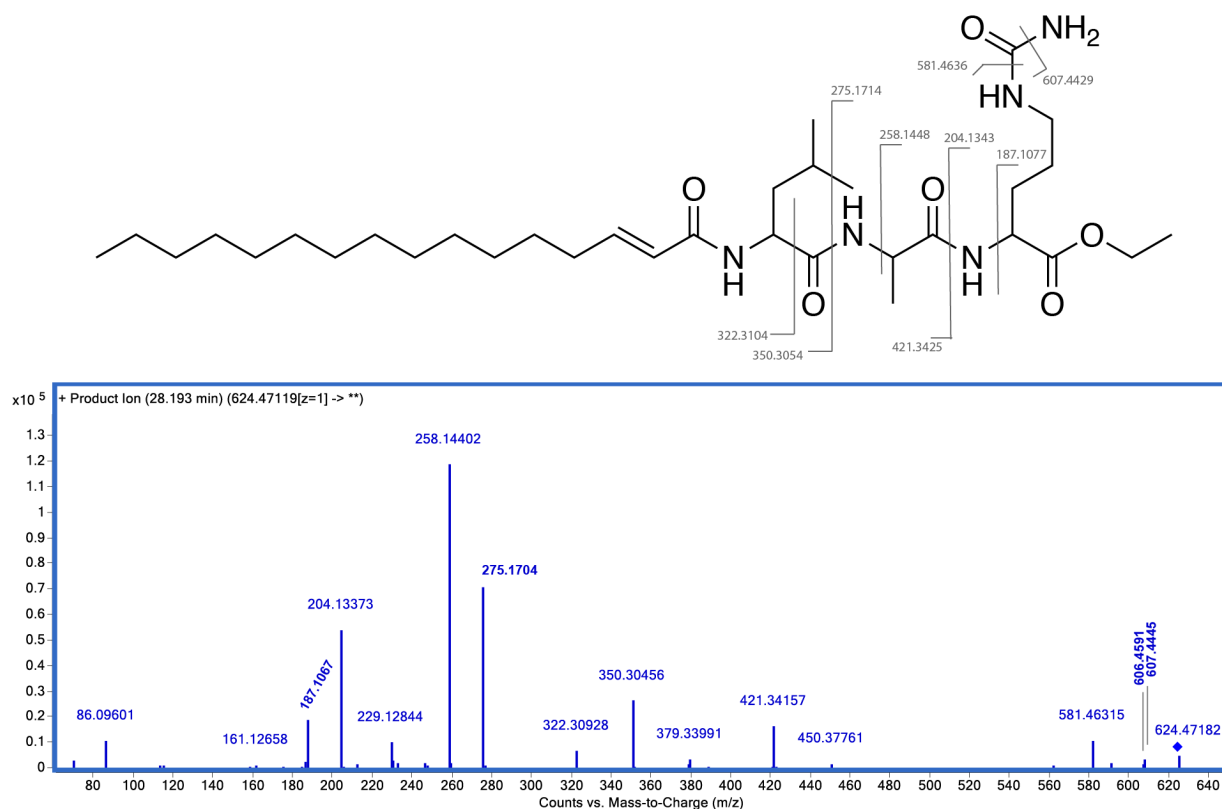

**Figure S19** Tandem MS assignment of proposed compound **8b**. Calculated exact mass of peptide fragment ions are shown on the structure. Double bond position and configuration was not determined.

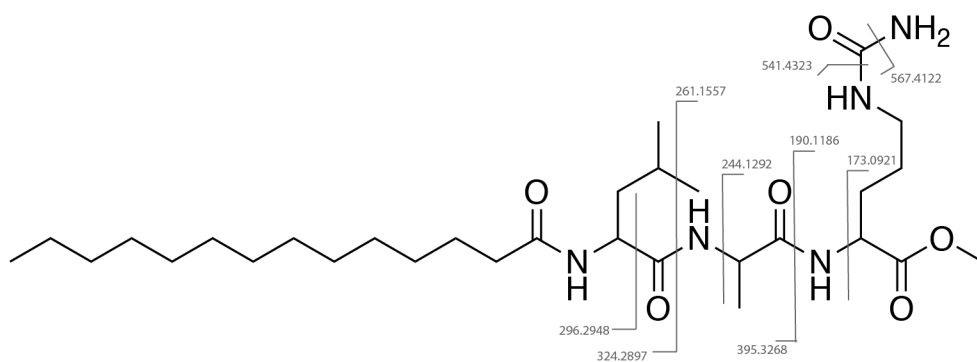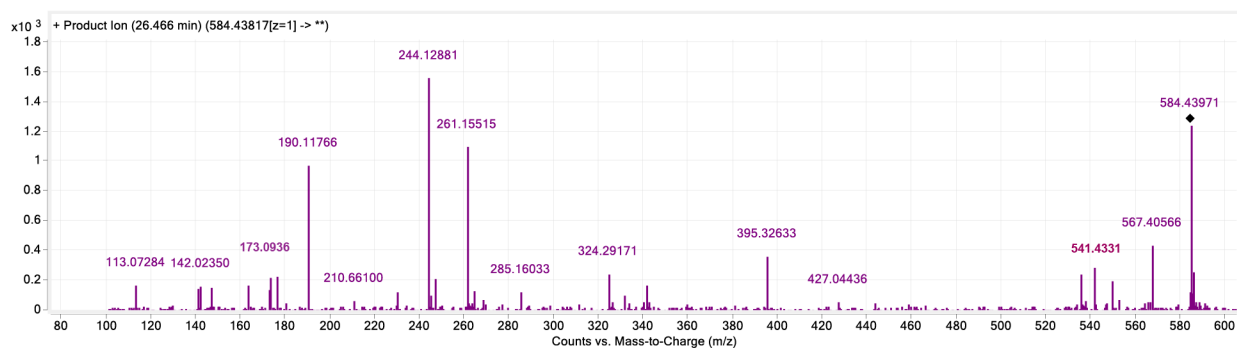

**Figure S20** Tandem MS assignment of proposed compound **6c**. Calculated exact mass of peptide fragment ions are shown on the structure.

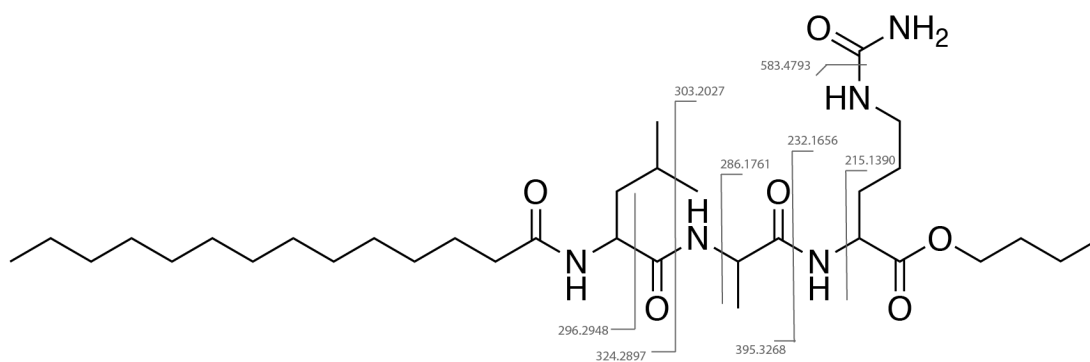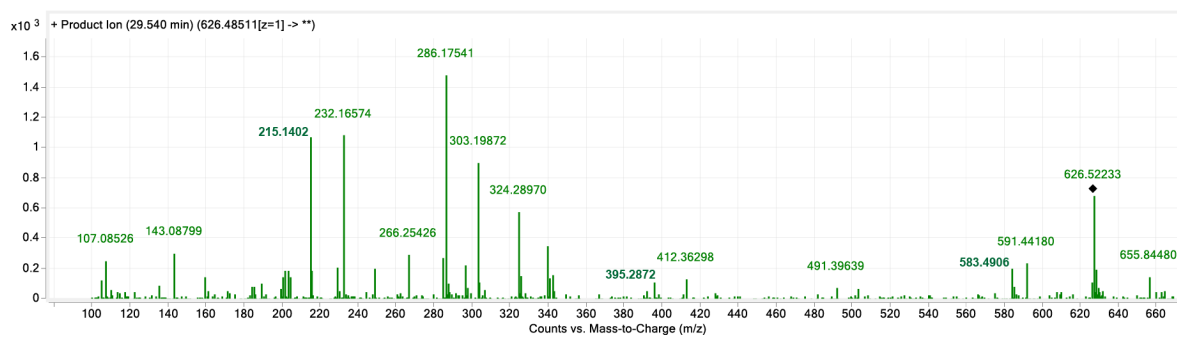

**Figure S21** Tandem MS assignment of proposed compound **6d**. Calculated exact mass of peptide fragment ions are shown on the structure.



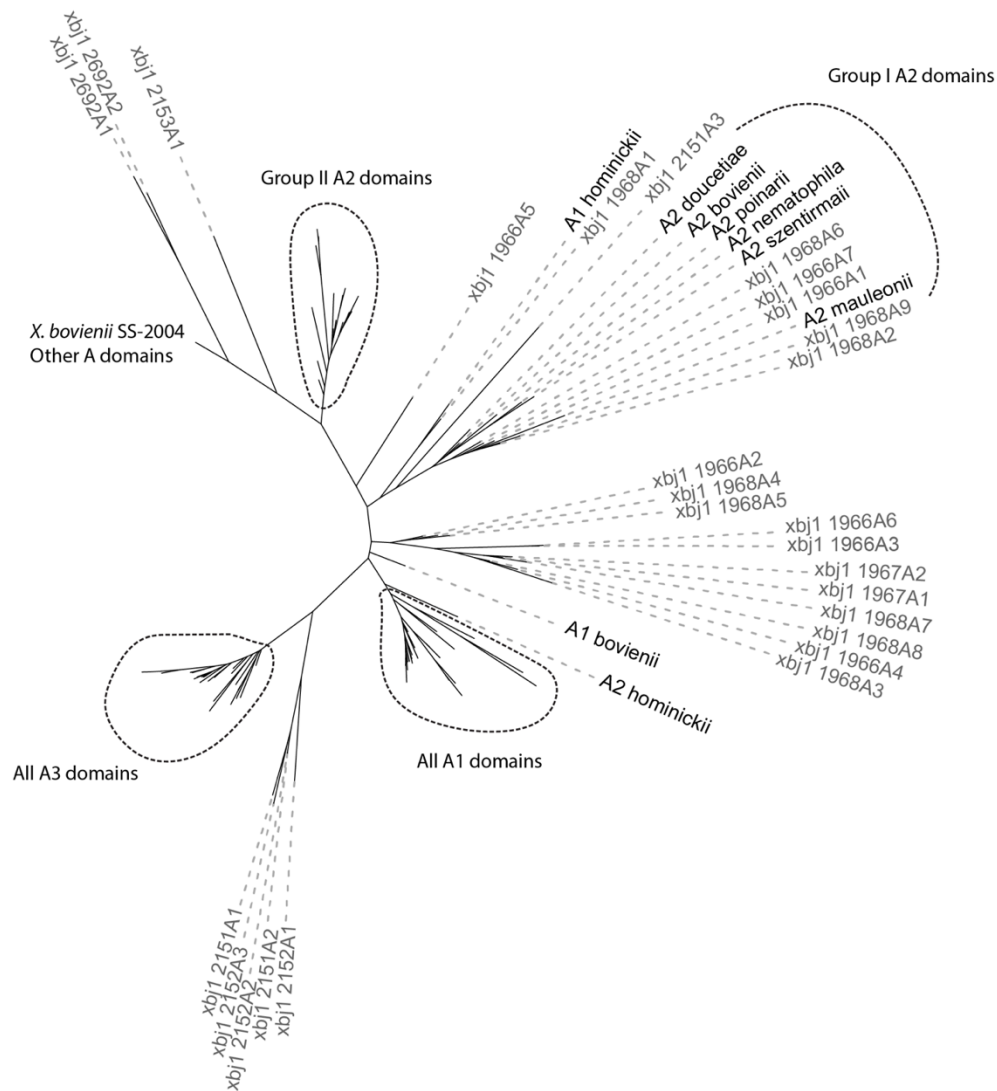

**Figure S22** Maximum likelihood tree of all annotated adenylation domains in *X. bovienii* SS-2004 and *XBJ1\_2367* homologues from different *Xenorhabdus* species. Genes from *X. bovienii* SS-2004 are labeled as *xbj1* based on MaGe genome annotations. *xbj1\_2151* (*paxC*) and *xbj1\_2152* (*paxB*) belong to PAX-peptide synthetase.

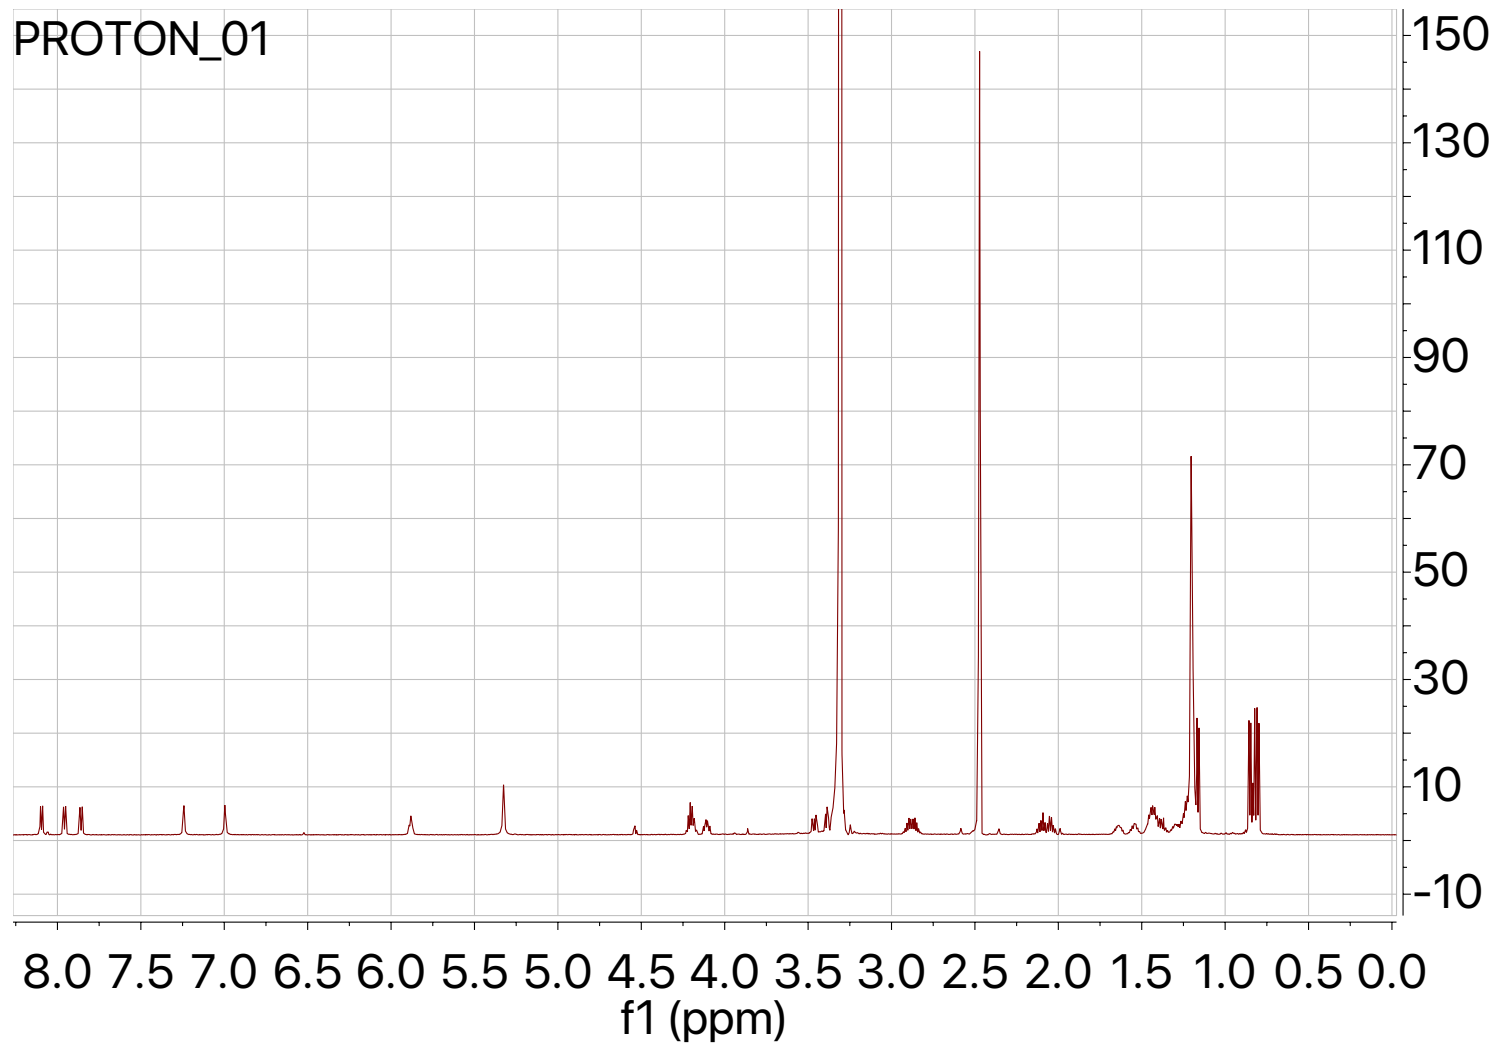

**Figure S23**  $^1\text{H}$  NMR spectrum of bovienimide A (**5**), 600 MHz,  $\text{DMSO-}d_6$ , 25 °C

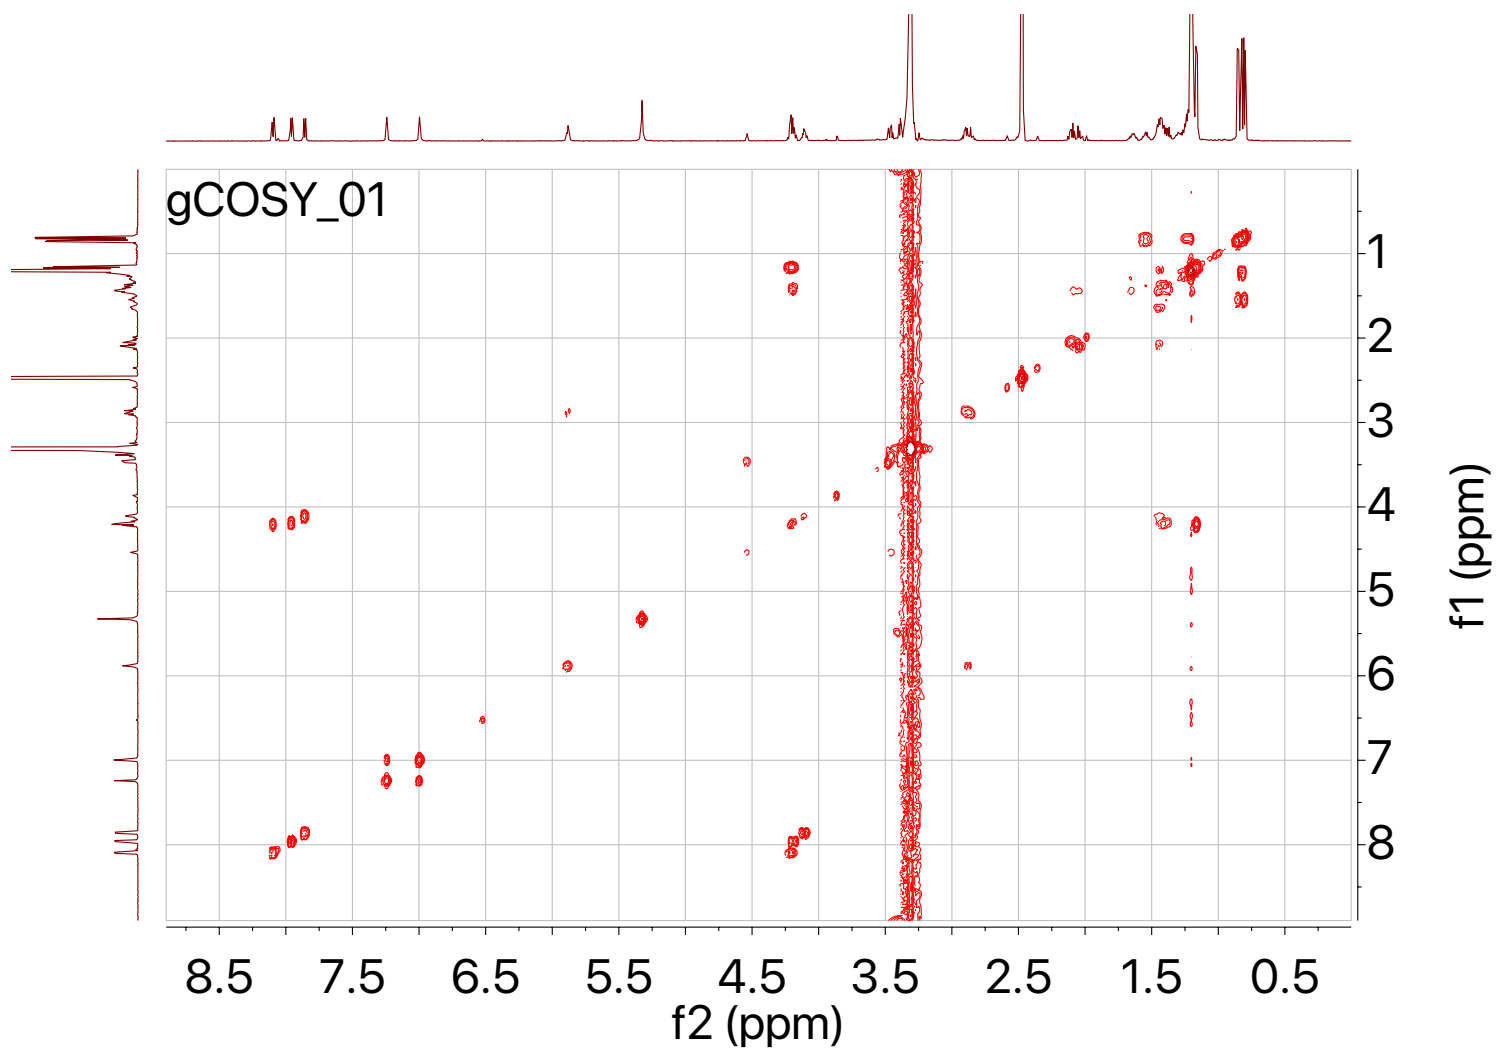

**Figure S24** gCOSY NMR spectrum of bovienimide A (**5**), 600 MHz, DMSO-*d*<sub>6</sub>, 25 °C

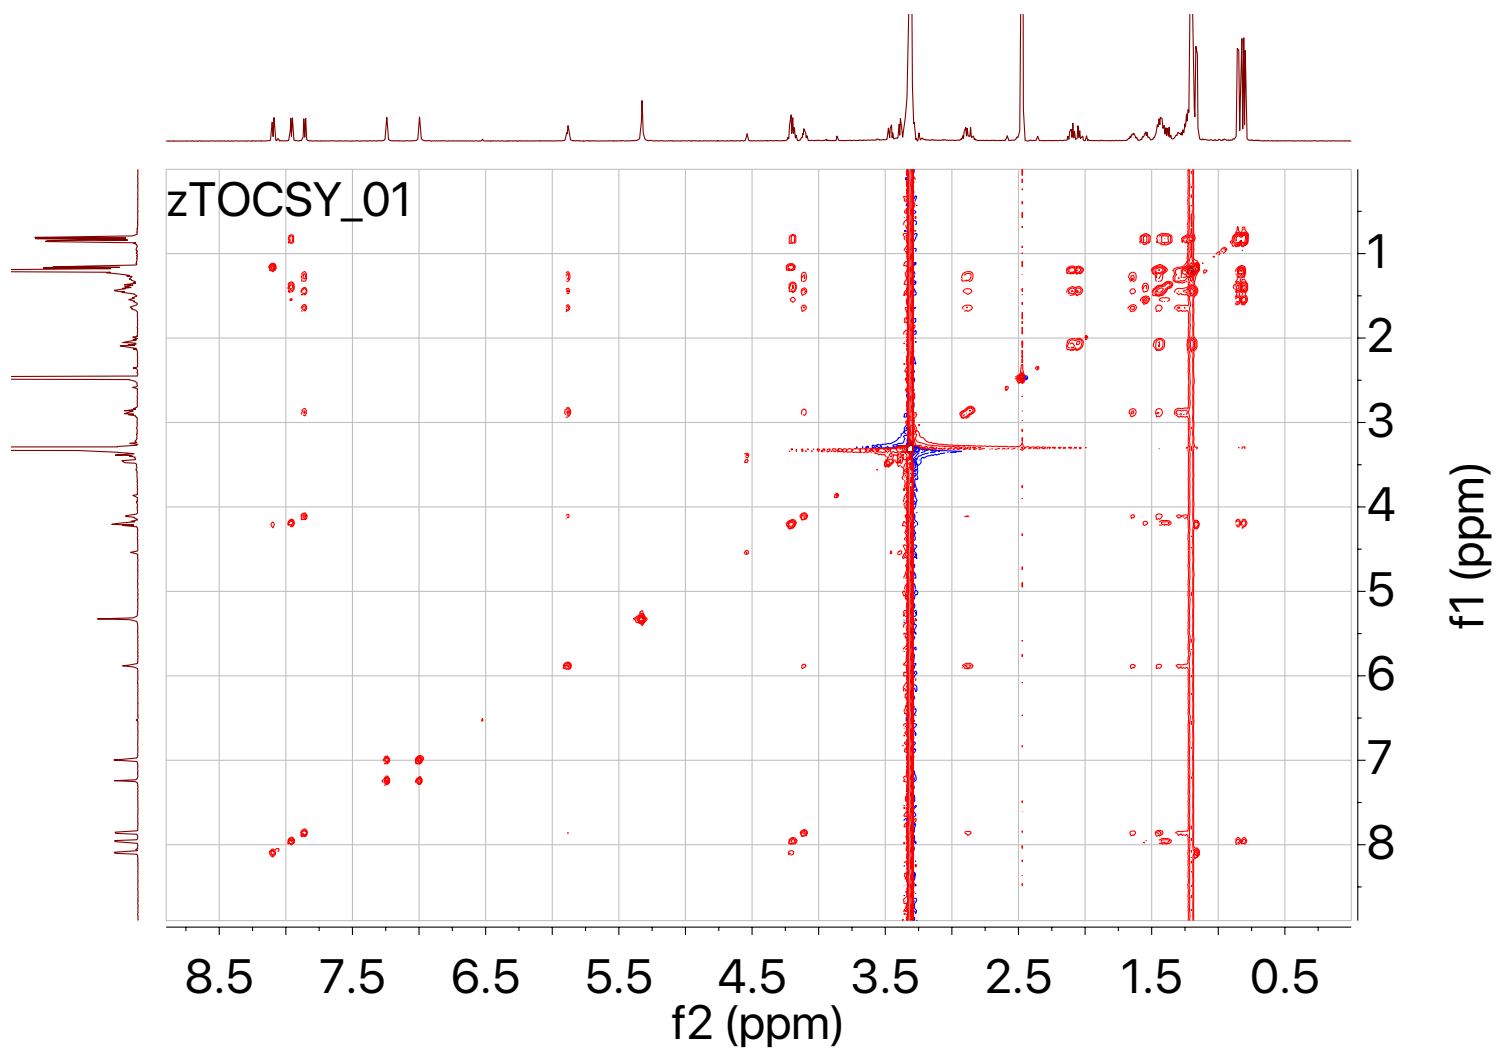

**Figure S25** zTOCSY NMR spectrum of bovienimide A (5), 600 MHz, DMSO-*d*<sub>6</sub>, 25 °C

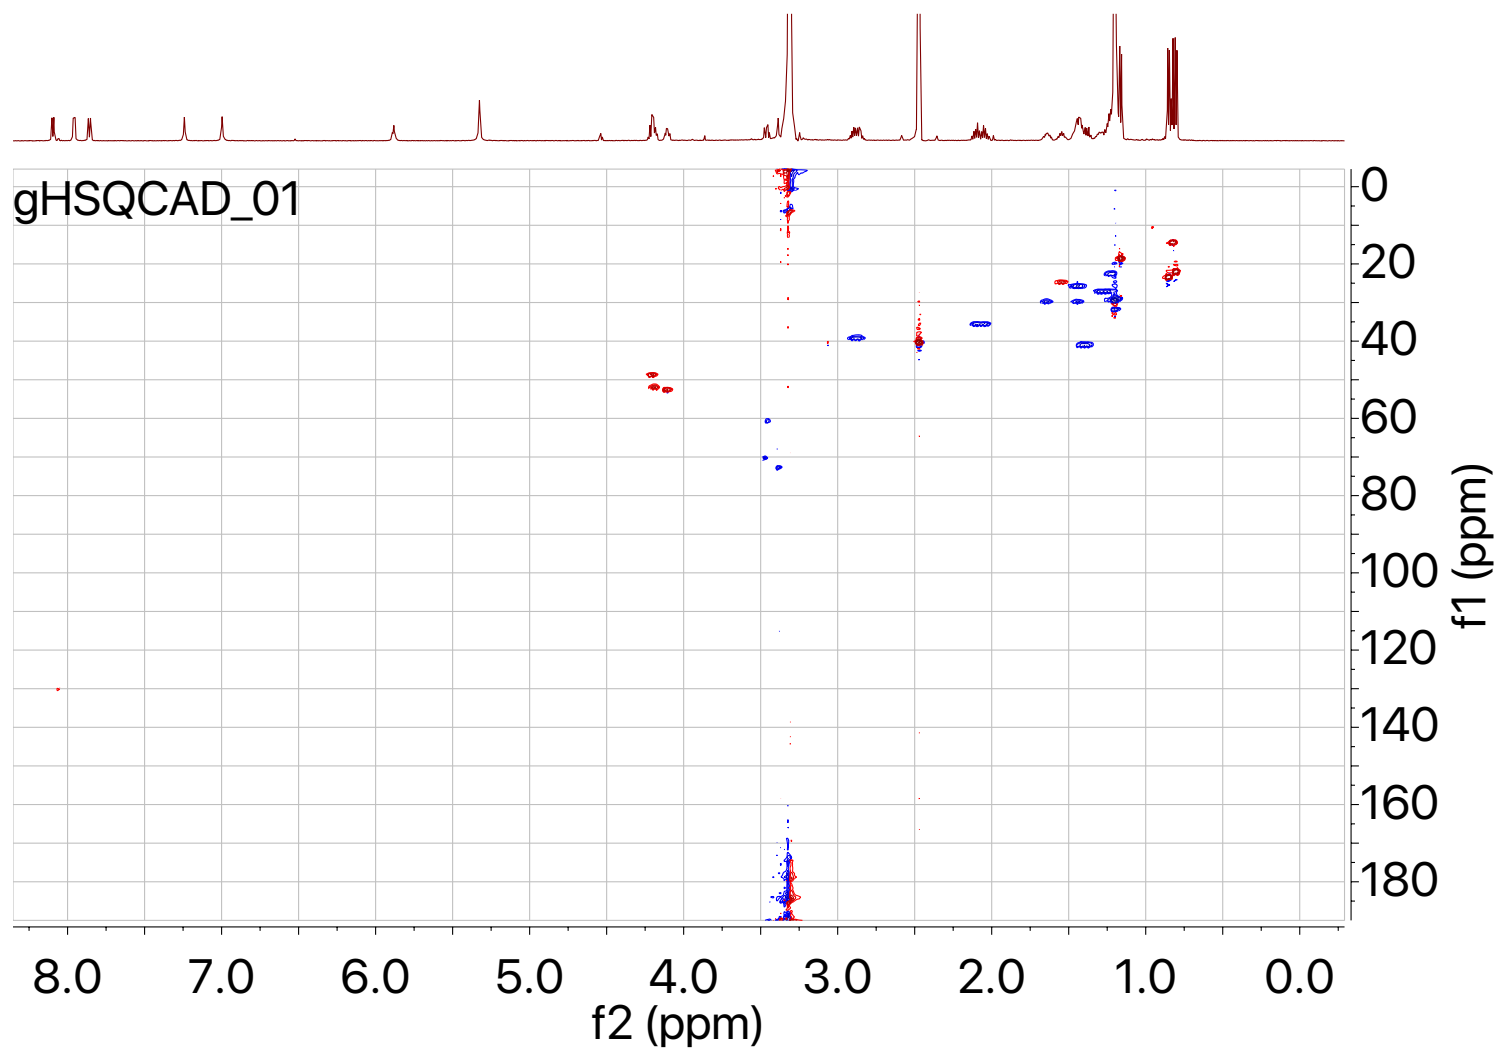

**Figure S26**  $^1\text{H}$ - $^{13}\text{C}$  gHSQC NMR spectrum of bovienimide A (**5**), 600 MHz,  $\text{DMSO-}d_6$ , 25 °C

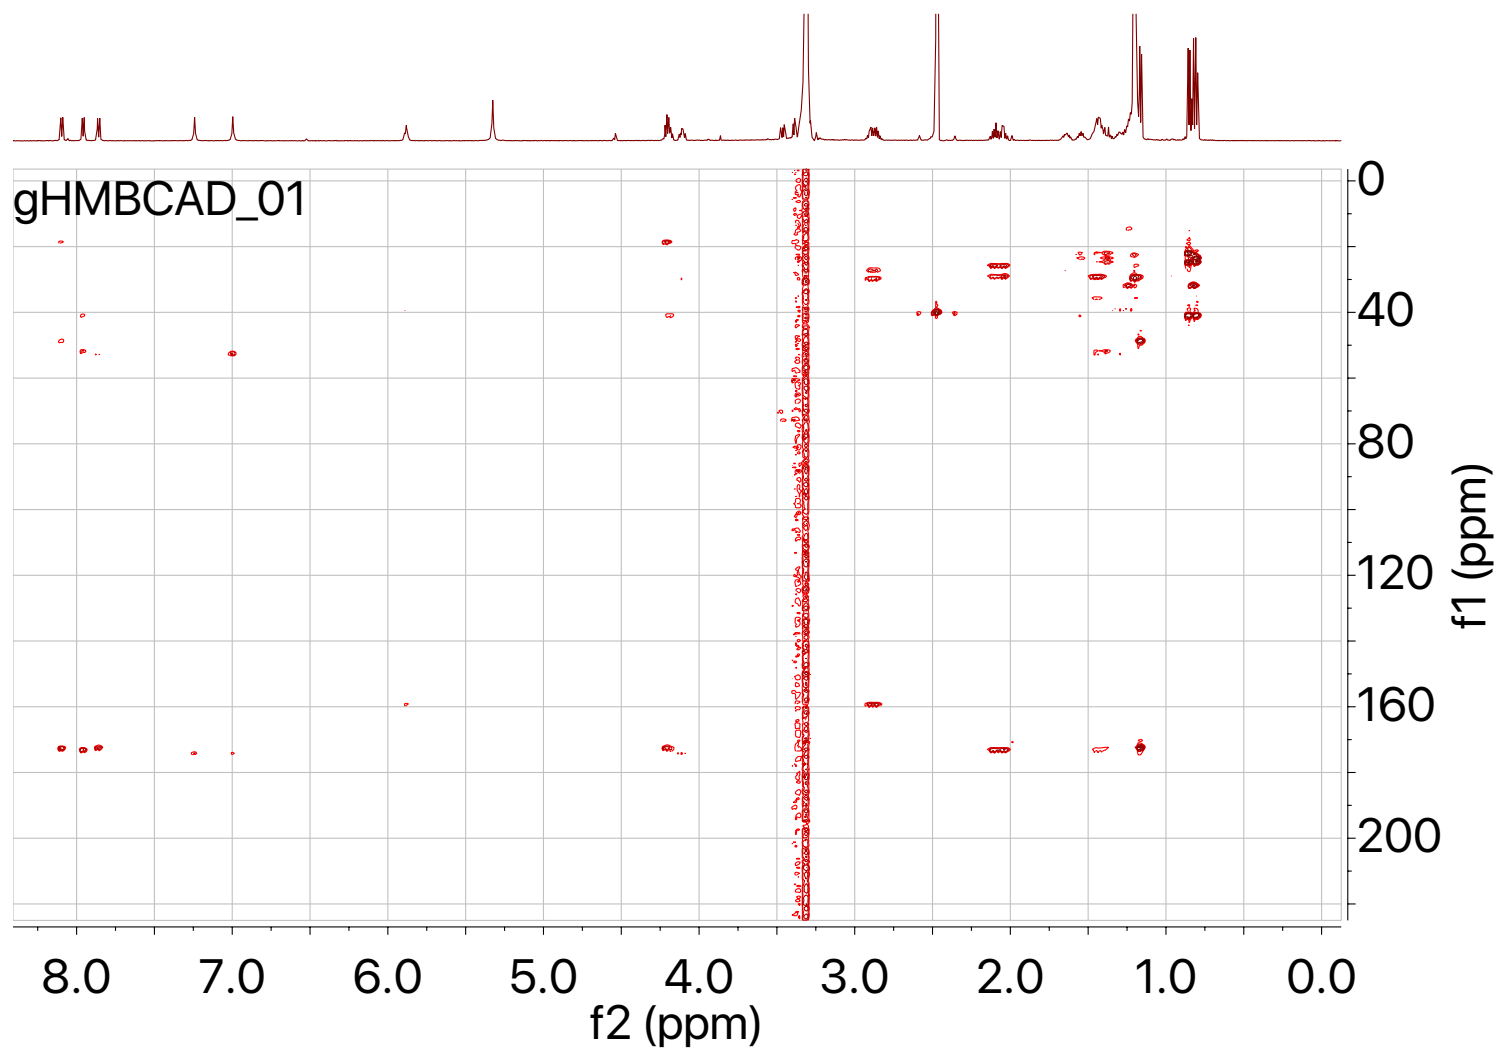

Figure S27  $^1\text{H}$ - $^{13}\text{C}$  gHMBC NMR spectrum of bovienimide A (5), 600 MHz,  $\text{DMSO-}d_6$ , 25  $^\circ\text{C}$

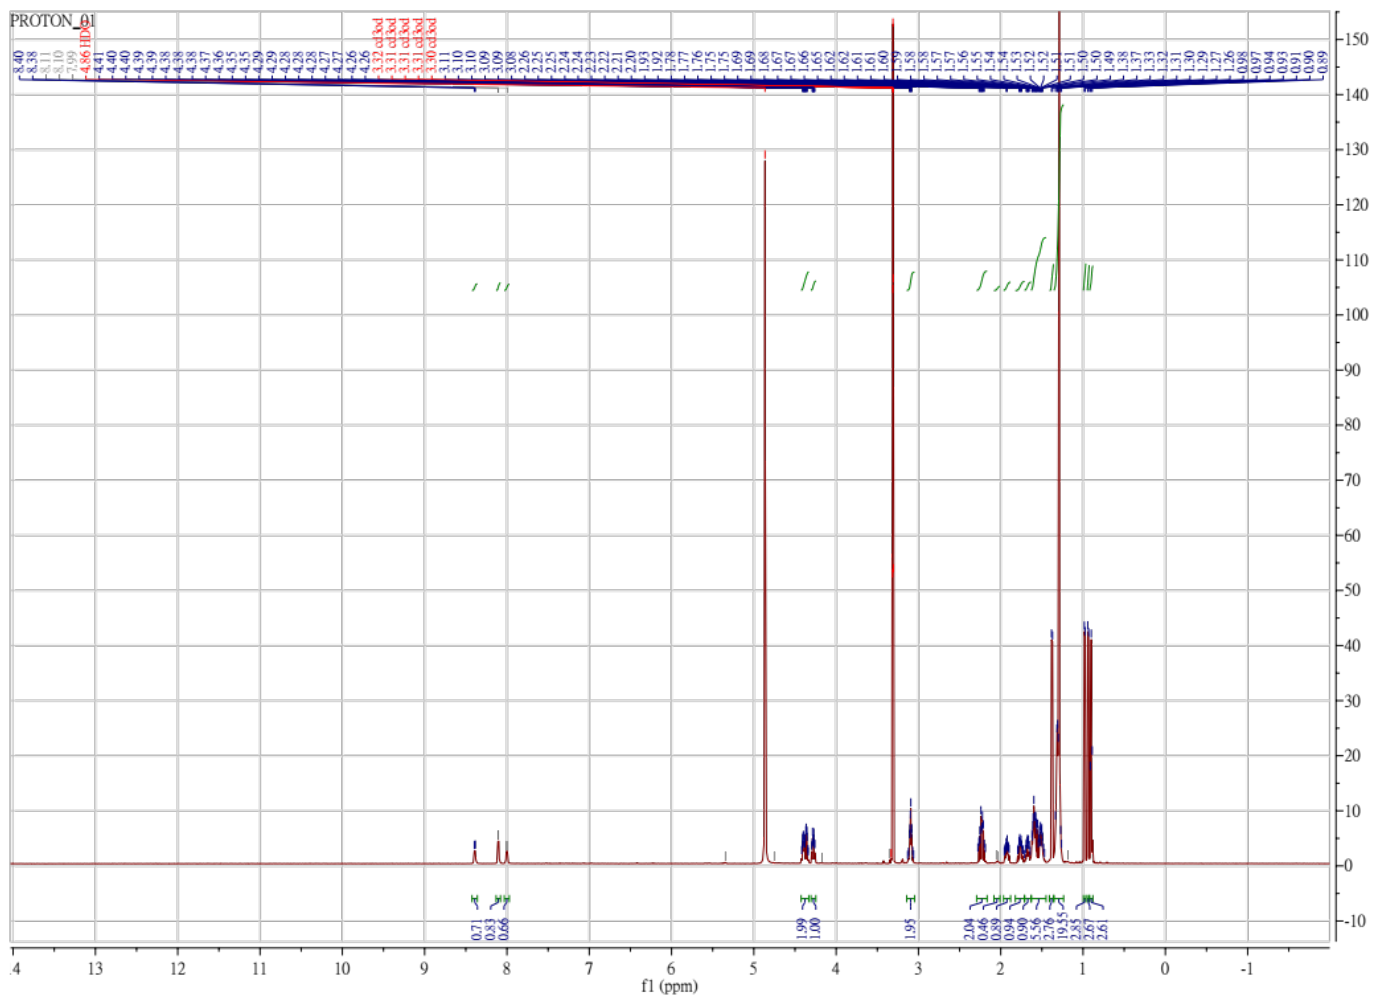

Figure S28  $^1\text{H}$  NMR spectrum of bovienimide B (6), 600 MHz, MeOD- $d_4$ , 25 °C





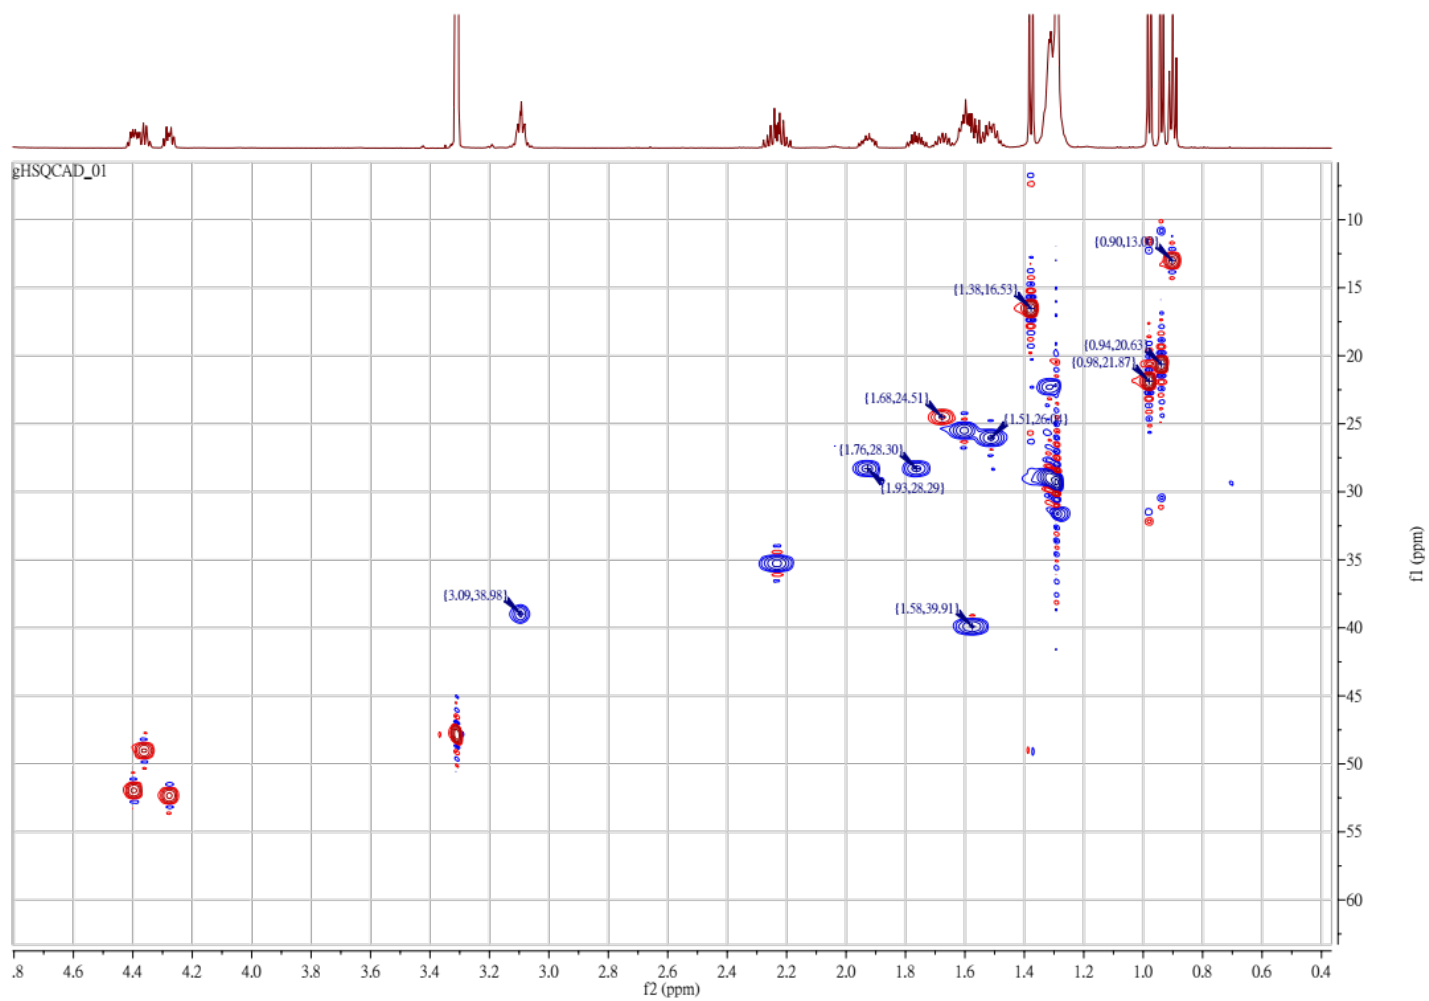

**Figure S30**  $^1\text{H}$ - $^{13}\text{C}$  gHSQC NMR spectrum of bovienimide B (**6**), 600 MHz,  $\text{MeOD-}d_4$ , 25 °C

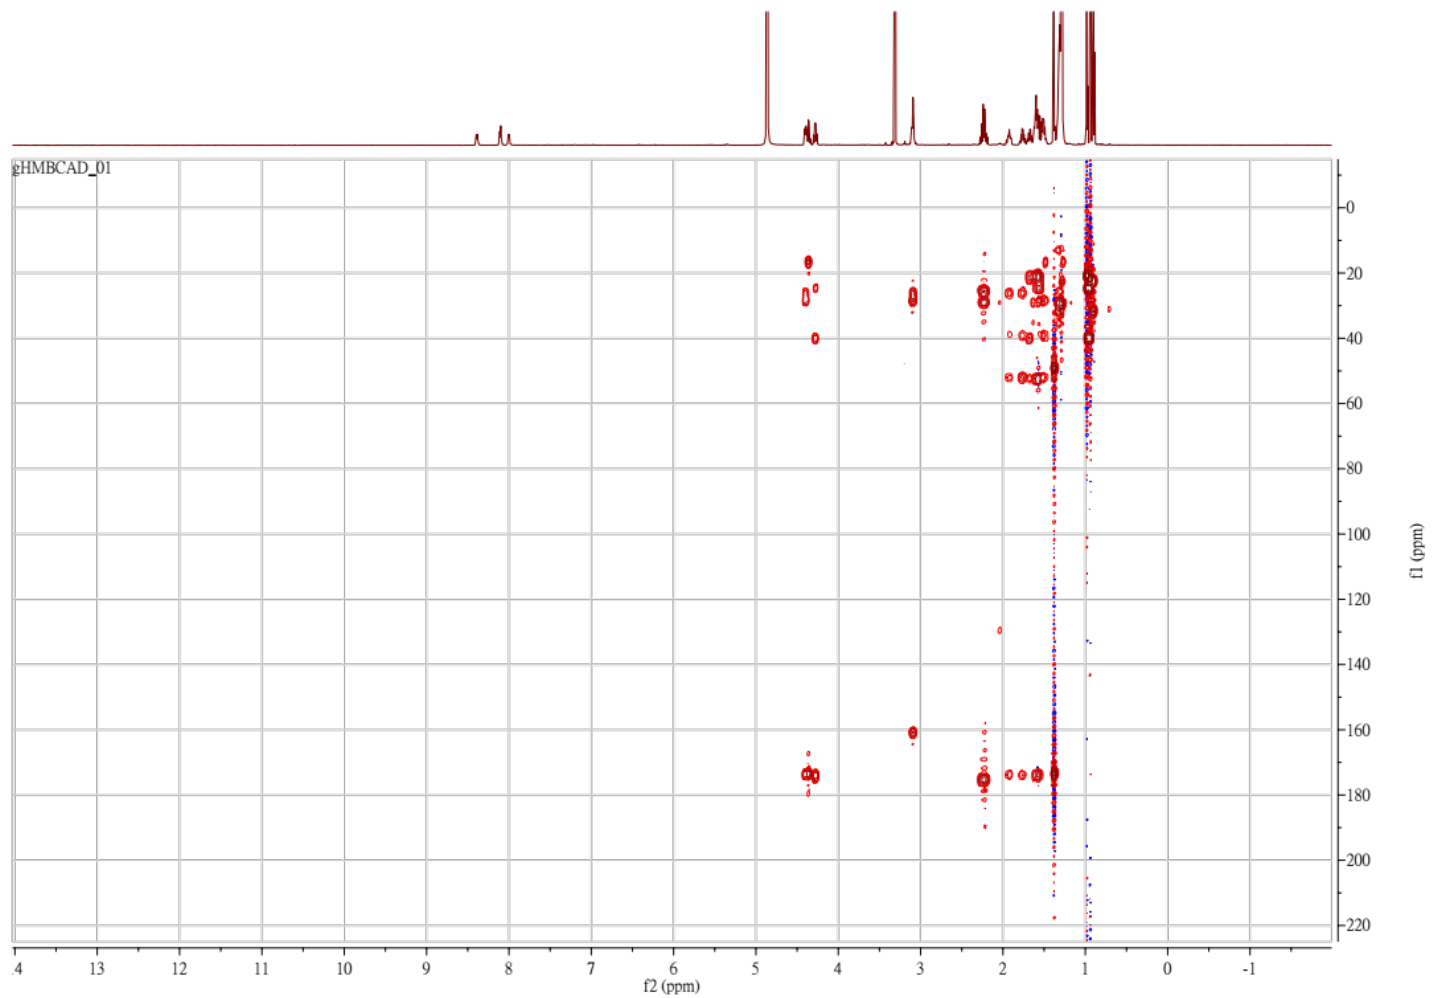

**Figure S31**  $^1\text{H}$ - $^{13}\text{C}$  gHMBC NMR spectrum of bovienimide B (**6**), 600 MHz,  $\text{MeOD-}d_4$ , 25 °C

### **Supplementary References**

Kroeze, W.K., Sassano, M.F., Huang, X.P., Lansu, K., McCorvy, J.D., Giguere, P.M., Sciaky, N., and Roth, B.L. (2015). PRESTO-Tango as an open-source resource for interrogation of the druggable human GPCRome. *Nat. Struct. Mol. Biol.* 22, 362-369.
